# Supplementary material for: Research on the catalytic activity of MNP-[Dop-OH]-CuBr2 nanocomposites: novel and stable reusable nanocatalysts for the synthesis of 1,3,5-triazine derivatives
Source: Royal Society of Chemistry journal article supplement (doi:10.1039/d3ra02261g), 2023-01-01
Supplement: d3ra02261g1.pdf [file d3ra02261g1.pdf]

## Supplementary Information

### Research on catalytic activity of MNPs-[Dop-OH]-CuBr<sub>2</sub> nanocomposite: A novel and stable reusable nanocatalyst for synthesis of 1,3,5-Triazine derivatives

Shouchun Feng <sup>1\*</sup>, Jinwang Tan <sup>1</sup>, Yufan Ma <sup>1</sup> and Li-Yuan Chang <sup>2\*</sup>

<sup>1</sup> Department of Chemical Engineering Tianjin Renai Coll, Tianjin 301636, Peoples R China

<sup>2</sup> Chemical Nanotechnology Research Institute, shanghai, China.

**Mail:** Liyuanchang839@gmail.com

#### Abstract

Magnetic nanocatalysts have been one of the best suggestions of chemists in recent years. Among magnetic nanoparticles, Fe<sub>3</sub>O<sub>4</sub> nanoparticles are more suitable due to their magnetic properties, chemical stability and less toxicity. These catalysts can be separated after the chemical process through magnetic separation and reused after regeneration. Considering the importance of 1,3,5-triazines derivatives in pharmaceutical and medicinal chemistry, the synthesis of these compounds is always one of the important goals of organic chemists. In this research work, we first successfully synthesized the CuBr<sub>2</sub> immobilized on magnetic Fe<sub>3</sub>O<sub>4</sub> nanoparticles functionalized with Dop-OH [prepared the reaction of MNPs-Dopamine with 2-phenyloxirane] nanocomposite and then investigated its catalytic application in the synthesis of 1,3,5-triazine derivatives through oxidative coupling reaction of amidine hydrochlorides and alcohols in air. Recycling experiments clearly revealed that MNPs-[Dop-OH]-CuBr<sub>2</sub> nanocatalyst could be reused for at least 8 runs with reasonable loss of catalytic activity.

**Keywords:** MNPs-[Dop-OH]-CuBr<sub>2</sub> nanocatalyst, 1,3,5-triazines derivatives, Oxidative coupling reaction, High reusability.

Scope of oxidative coupling reaction of amidine hydrochlorides and alcohols catalyzed by MNPs-[Dop-OH]-CuBr<sub>2</sub> nanocomposite under air conditions <sup>a</sup>

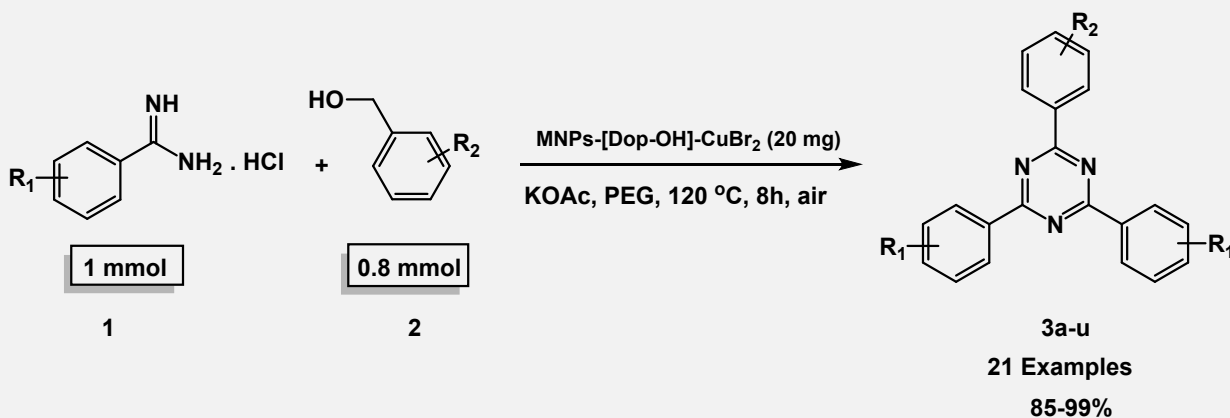

## Supplementary Information

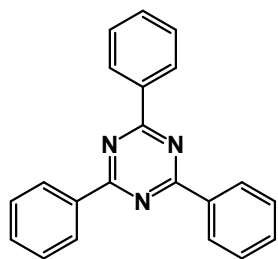

**3a (98%)**

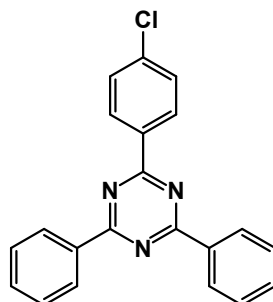

**3b (99%)**

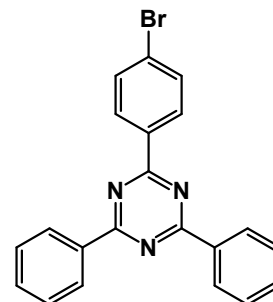

**3c (99%)**

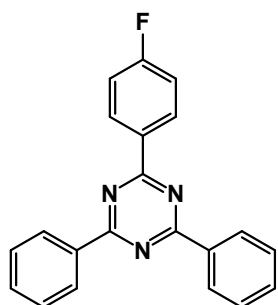

**3d (96%)**

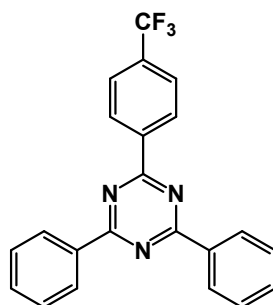

**3e (93%)**

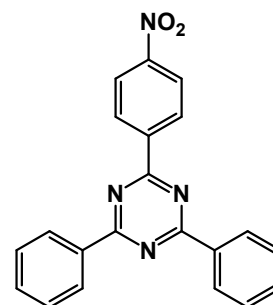

**3f (97%)**

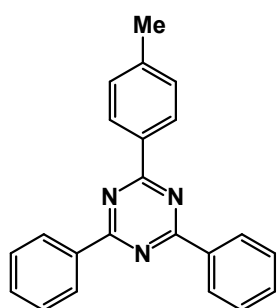

**3g (94%)**

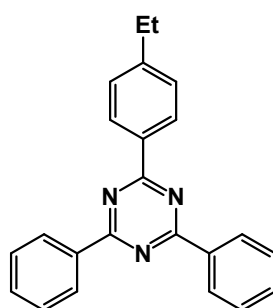

**3h (92%)**

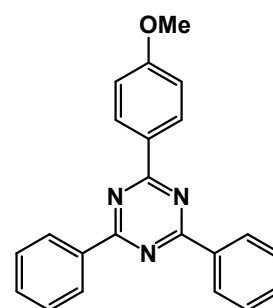

**3i (93%)**

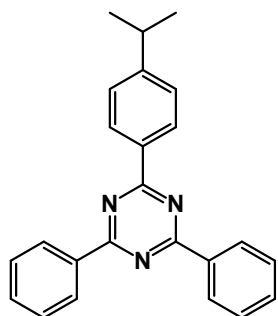

**3j (90%)**

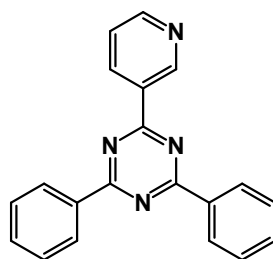

**3k (92%)**

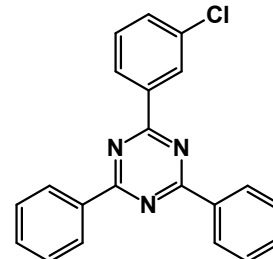

**3l (92%)**

Supplementary Information

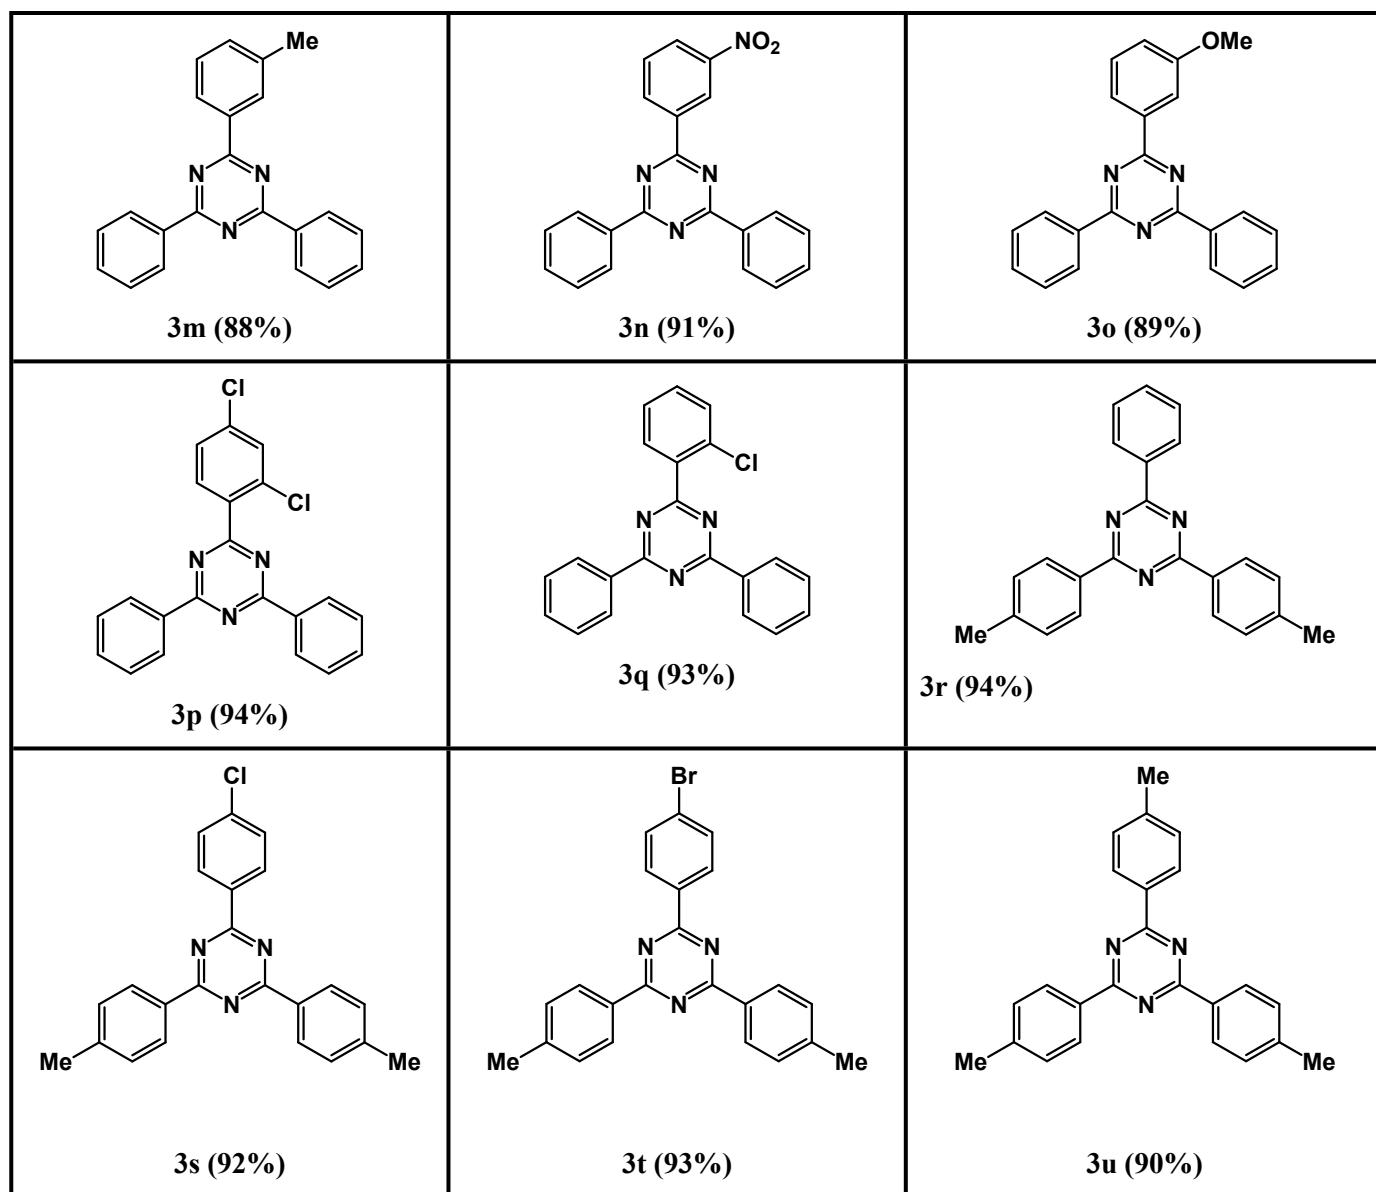

<sup>a</sup> Isolated yield.

# Supplementary Information

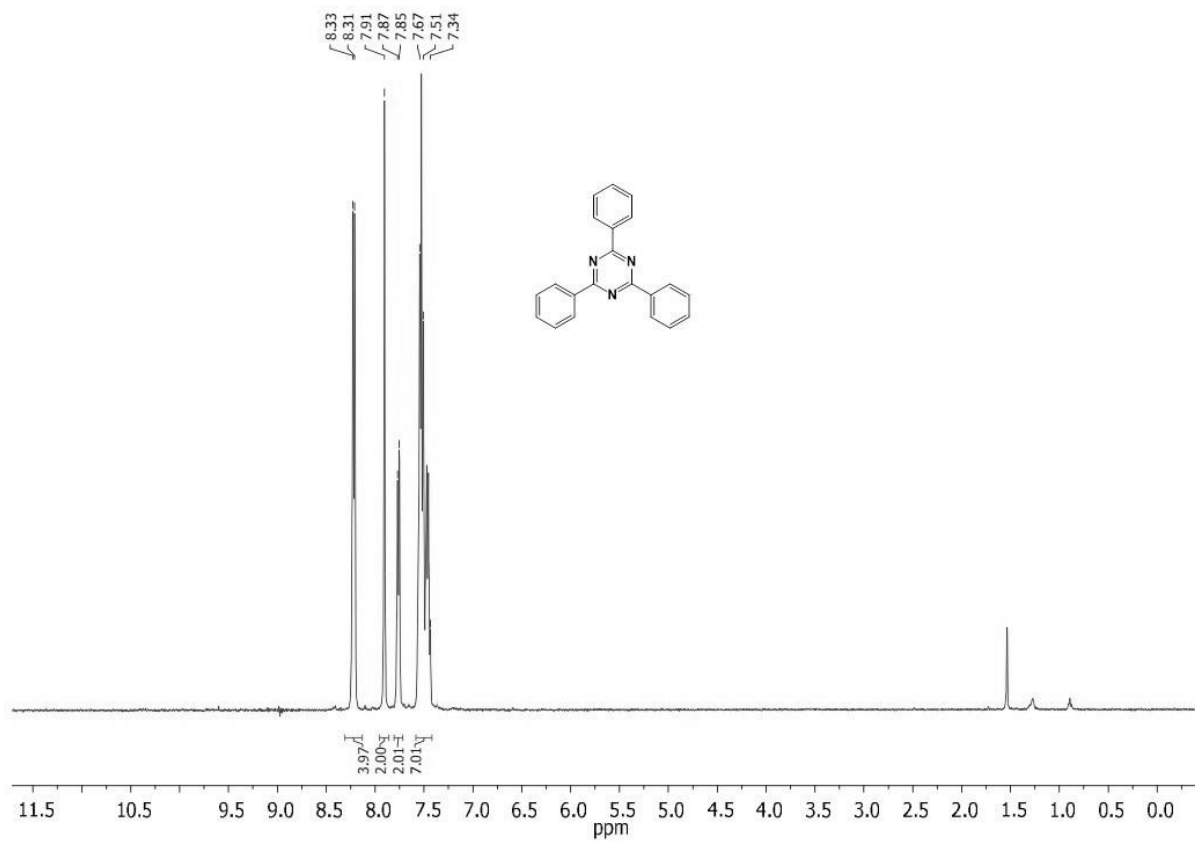

8.33  
8.31  
7.91  
7.87  
7.85  
7.67  
7.51  
7.34

3.97  
2.00  
2.01  
7.01

11.5 10.5 9.5 9.0 8.5 8.0 7.5 7.0 6.5 6.0 5.5 5.0 4.5 4.0 3.5 3.0 2.5 2.0 1.5 1.0 0.5 0.0  
ppm

## Supplementary Information

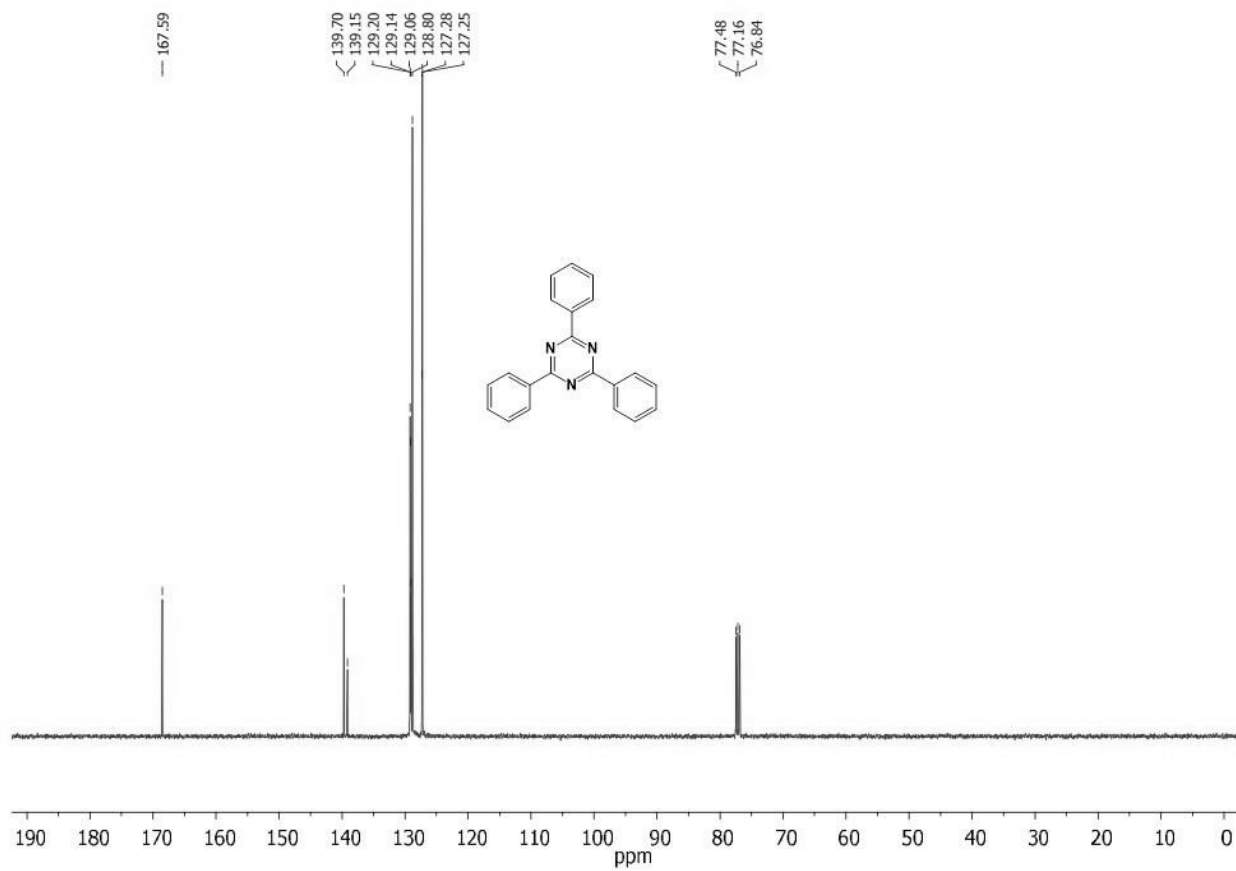

2,4,6-triphenyl-1,3,5-triazine: <sup>1</sup>H NMR (400.1 MHz, CDCl<sub>3</sub>): δ = 8.33-8.31 (d, J = 7.4 Hz, 4H), 7.91 (s, 2H), 7.87-7.85 (d, J = 7.4 Hz, 2H), 7.67-7.34 (m, 7H). <sup>13</sup>C{<sup>1</sup>H} NMR (100.6 MHz, CDCl<sub>3</sub>): δ = 167.6, 139.8, 139.2, 129.3, 129.1, 129.1, 128.8, 127.3, 127.3.

# Supplementary Information

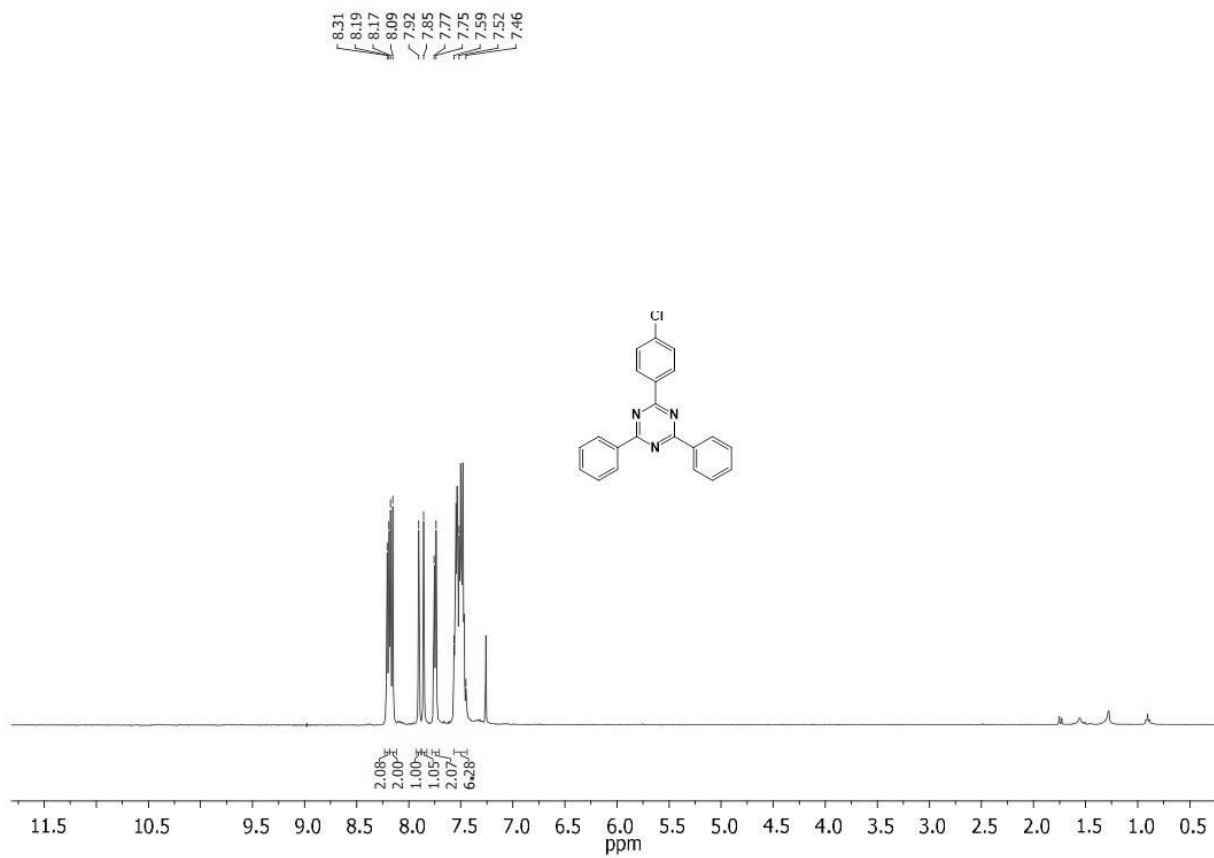

## Supplementary Information

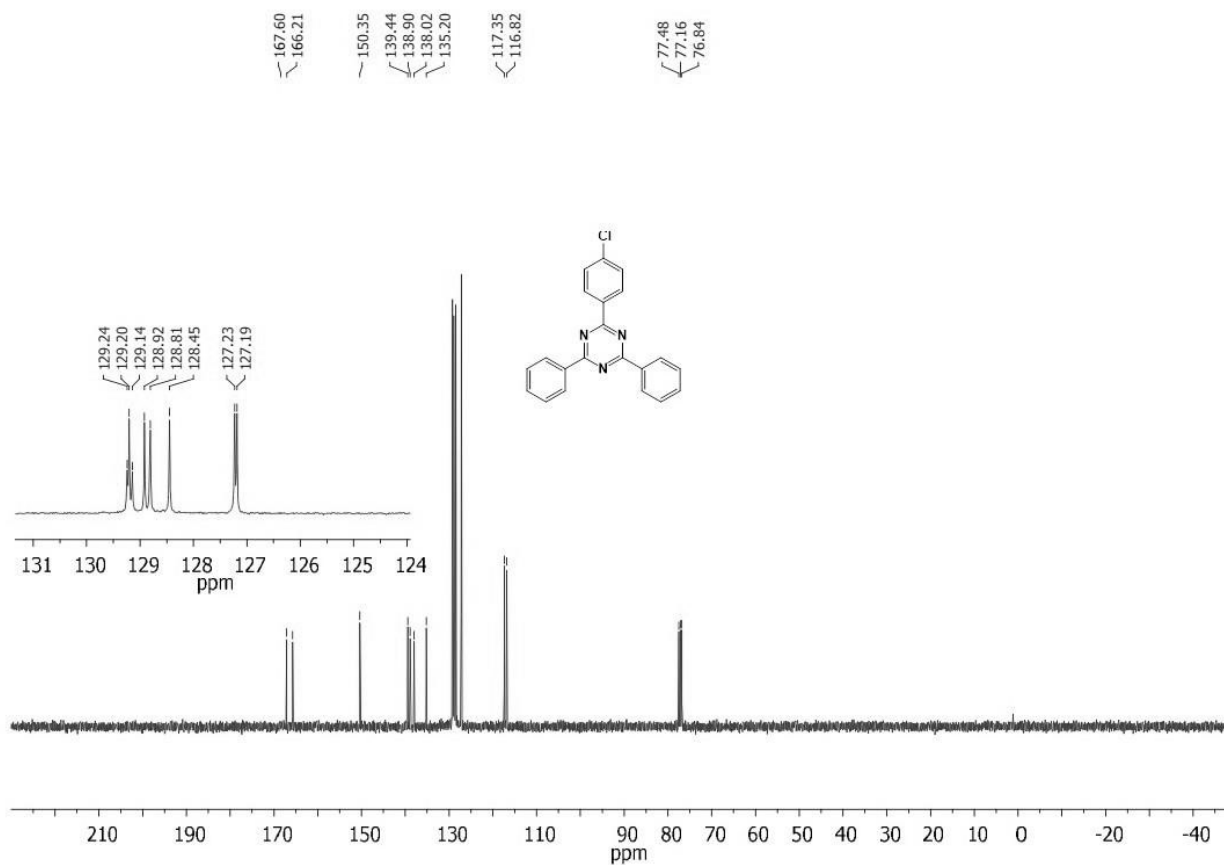

2-(4-chlorophenyl)-4,6-diphenyl-1,3,5-triazine:  $^1\text{H}$  NMR (400.1 MHz,  $\text{CDCl}_3$ ):  $\delta$  = 8.31-8.09 (d,  $J$  = 7.3 Hz, 4H), 7.92-7.85 (d,  $J$  = 8.5 Hz, 2H), 7.77-7.75 (s, 2H), 7.59-7.46 (m, 6H).  $^{13}\text{C}\{^1\text{H}\}$  NMR (100.6 MHz,  $\text{CDCl}_3$ ):  $\delta$  = 167.6, 166.2, 150.4, 139.4, 138.9, 138.0, 135.2, 129.2, 129.2, 129.1, 128.9, 128.8, 128.5, 127.2, 127.2, 117.4, 116.8.

# Supplementary Information

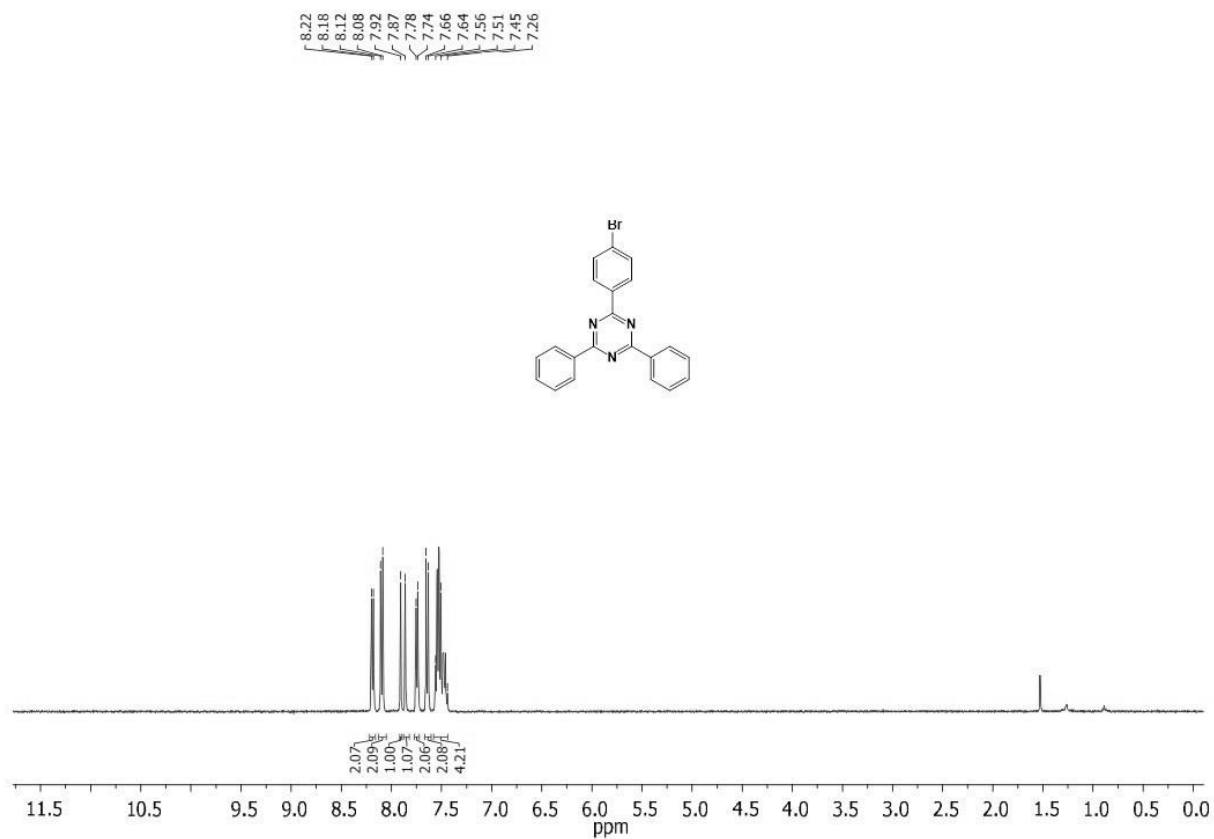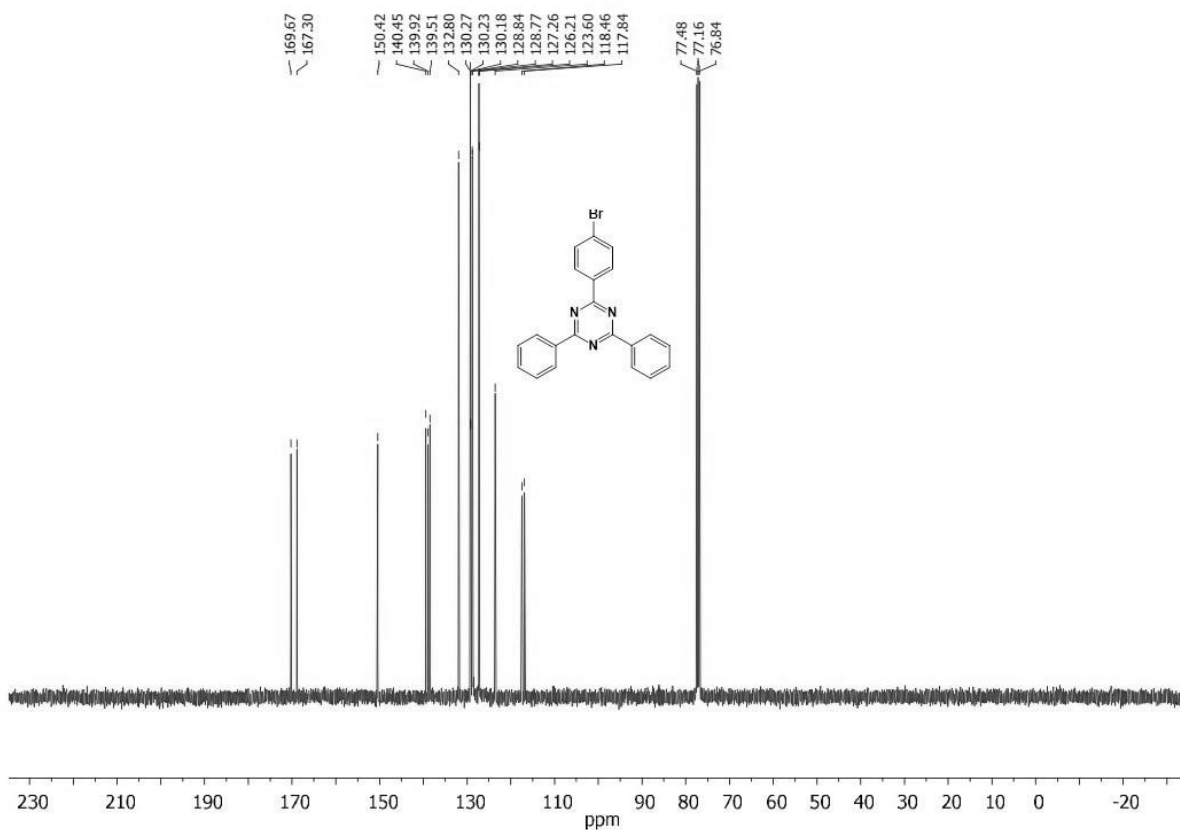



## Supplementary Information

2-(4-bromophenyl)-4,6-diphenyl-1,3,5-triazine:  $^1\text{H}$  NMR (400.1 MHz,  $\text{CDCl}_3$ ):  $\delta$  = 8.22 (d,  $J$  = 7.1 Hz, 2H), 8.18 (d,  $J$  = 8.6 Hz, 2H), 7.92 (s, 1H), 7.87 (s, 1H), 7.78-7.74 (d,  $J$  = 6.9 Hz, 2H), 7.66-7.64 (d,  $J$  = 8.6 Hz, 2H), 7.56-7.26 (m, 4H).  $^{13}\text{C}\{^1\text{H}\}$  NMR (100.6 MHz,  $\text{CDCl}_3$ ):  $\delta$  = 169.7, 167.3, 150.4, 140.5, 138.9, 139.5, 132.9, 130.3, 130.2, 130.2, 128.8, 128.8, 127.3, 126.2, 123.6, 118.5, 117.8.

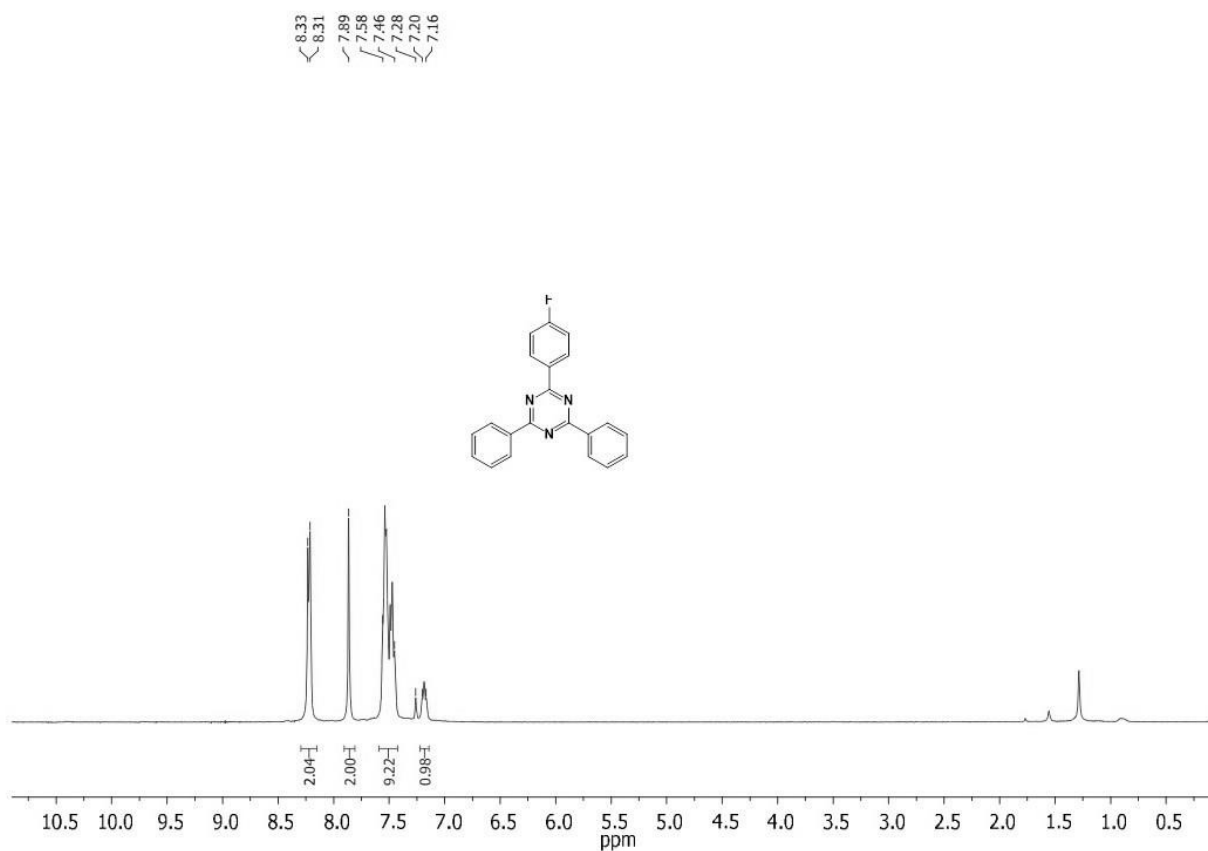

## Supplementary Information

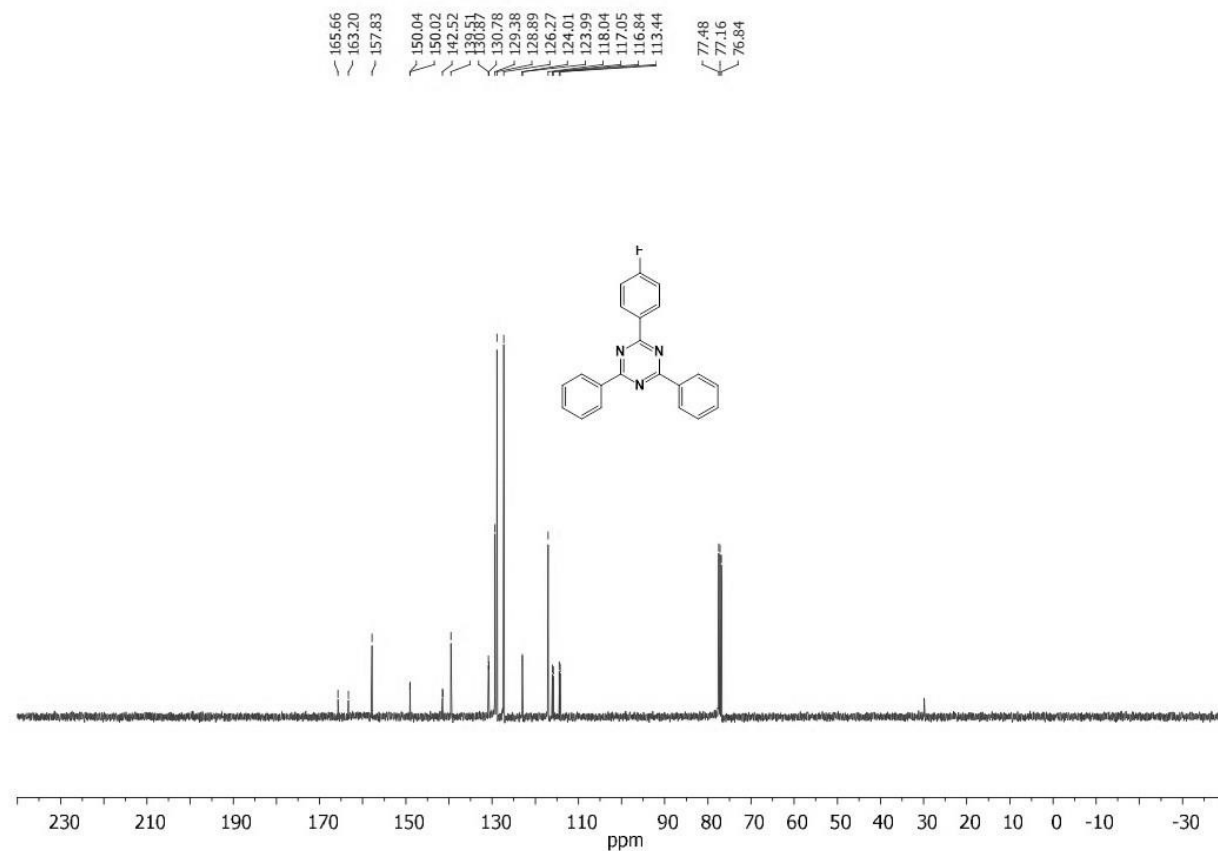

2-(4-fluorophenyl)-4,6-diphenyl-1,3,5-triazine: <sup>1</sup>H NMR (400.1 MHz, CDCl<sub>3</sub>): δ = 8.33–8.31 (d, J = 7.4 Hz, 2H), 7.89 (s, 2H), 7.58–7.28 (m, 9H), 7.20–7.16 (m, 1H). <sup>13</sup>C{<sup>1</sup>H} NMR (100.6 MHz, CDCl<sub>3</sub>): δ = 165.7, 163.2, 157.8, 150.0, 142.5 (d, J = 7.8 Hz), 140.5, 131.8 (d, J = 8.3 Hz), 130.3, 129.9, 128.3, 126.4, 124.0 (d, J = 2.8 Hz), 118.0, 117.0 (d, J = 21.1 Hz), 116.9, 113.3 (d, J = 22.4 Hz).

# Supplementary Information

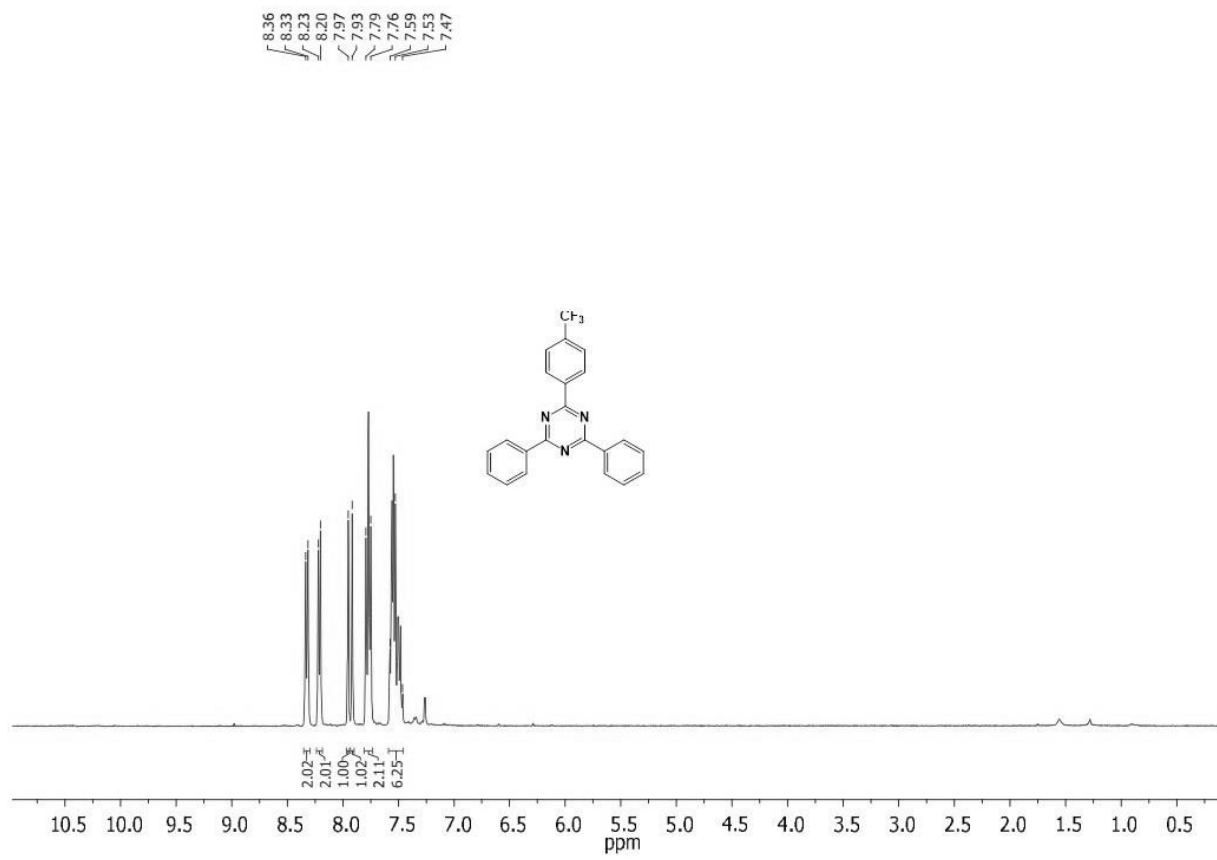

## Supplementary Information

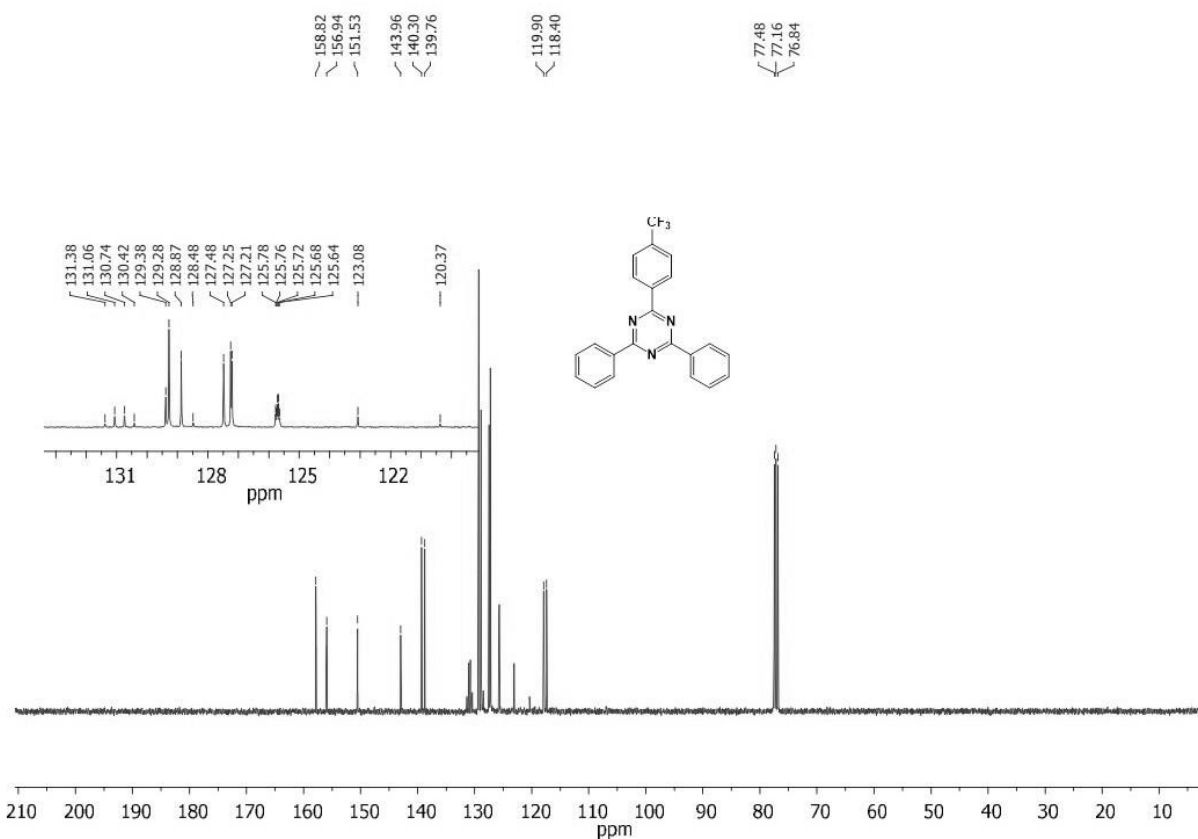

2,4-diphenyl-6-(4-(trifluoromethyl)phenyl)-1,3,5-triazine: <sup>1</sup>H NMR (400.1 MHz, CDCl<sub>3</sub>): δ = 8.36 (d, J = 8.3 Hz, 2H), 8.23 (d, J = 7.0 Hz, 2H), 7.97 (s, 1H), 7.93 (s, 1H), 7.79–7.76 (m, 2H), 7.59–7.47 (m, 6H). <sup>13</sup>C{<sup>1</sup>H} NMR (100.6 MHz, CDCl<sub>3</sub>): δ = 158.8, 156.9, 151.5, 143.0, 140.3, 139.8, 130.9 (q, J = 32.3), 129.4, 129.3, 129.3, 128.9, 127.5, 127.3, 127.2, 125.7 (q, J = 3.8 Hz), 124.4 (q, J = 272.0 Hz), 119.9, 118.4.

# Supplementary Information

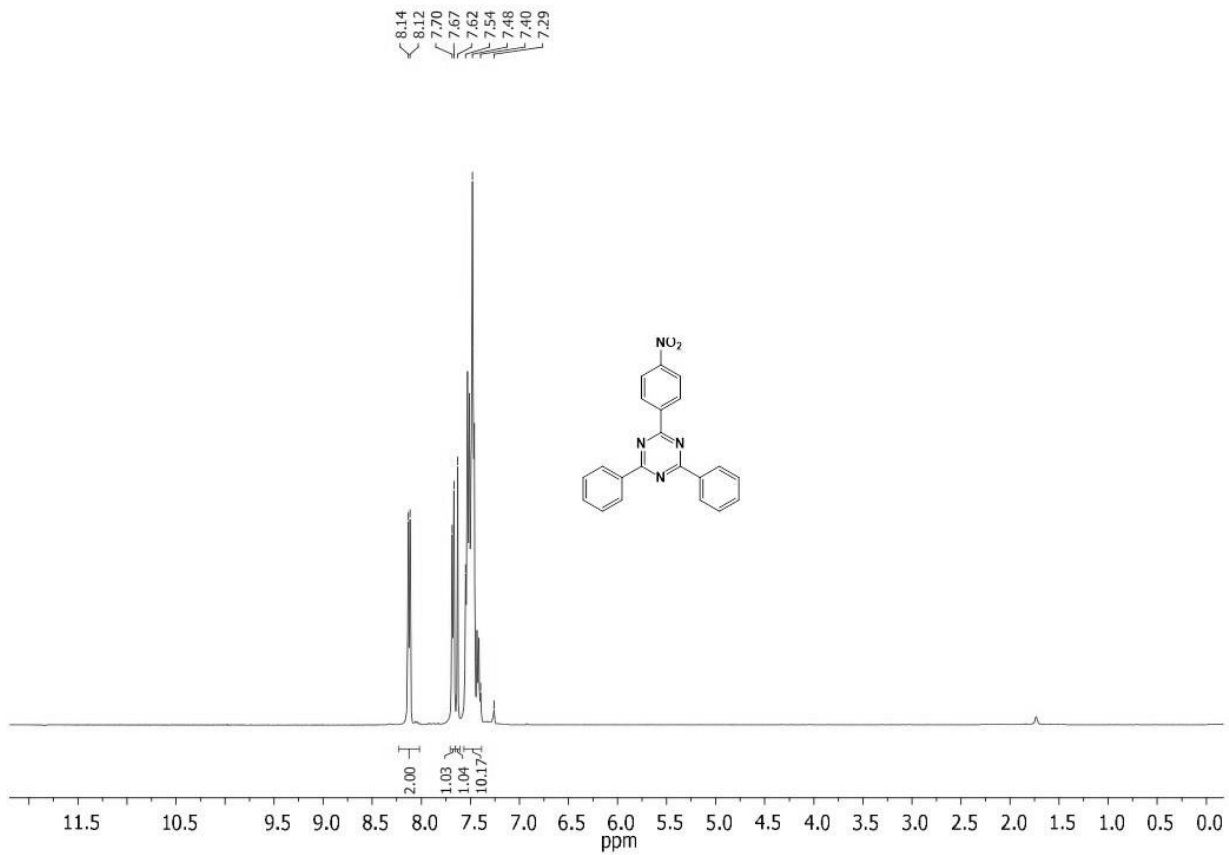

## Supplementary Information

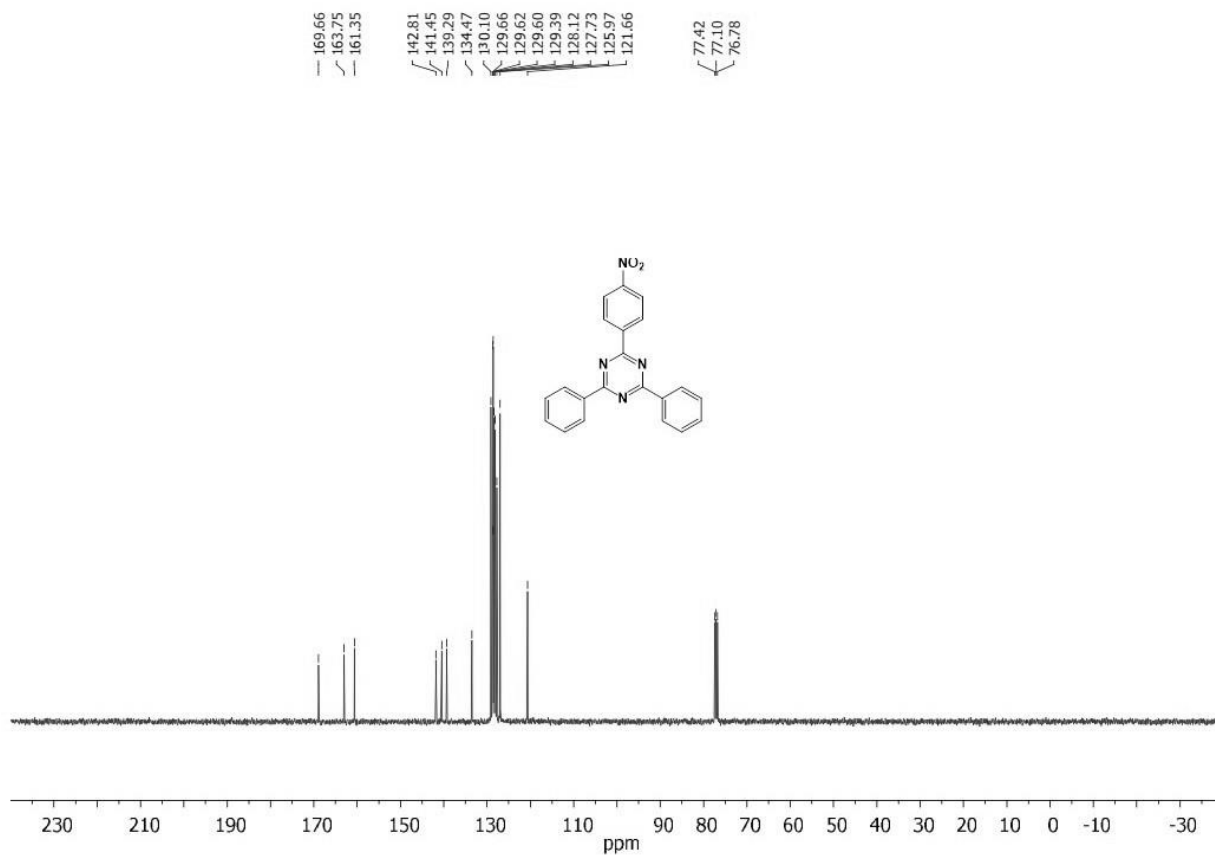

2-(4-nitrophenyl)-4,6-diphenyl-1,3,5-triazine: <sup>1</sup>H NMR (400.1 MHz, CDCl<sub>3</sub>): δ = 8.14 (d, J = 7.5 Hz, 2H), 7.70 (d, J = 7.5 Hz, 1H), 7.67 (s, 1H), 7.54–7.29 (m, 10H), <sup>13</sup>C {<sup>1</sup>H} NMR (100.6 MHz, CDCl<sub>3</sub>): δ = 169.7, 163.8, 161.4, 141.8, 141.5, 139.3, 134.5, 130.1, 129.7, 129.6, 129.6, 129.6, 129.4, 128.1, 127.7, 125.0, 121.7.

# Supplementary Information

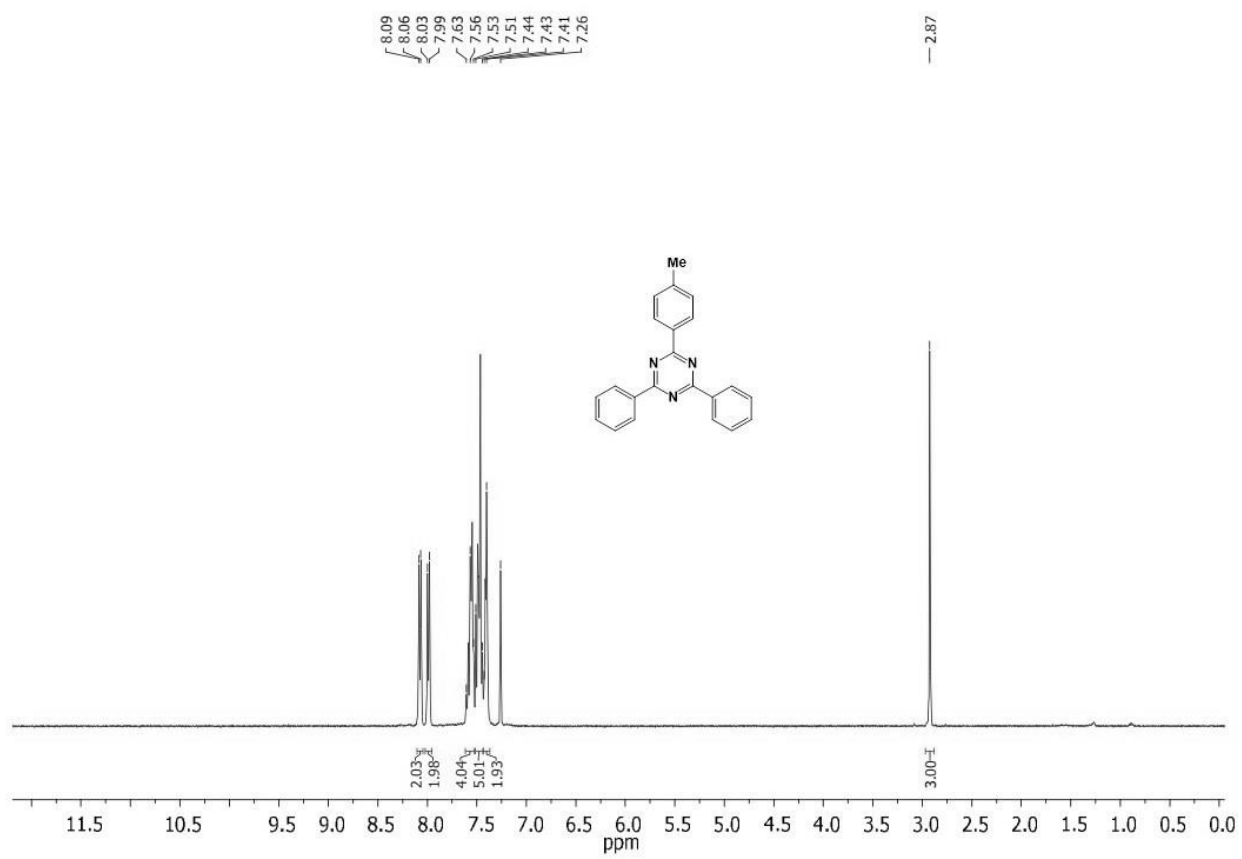

## Supplementary Information

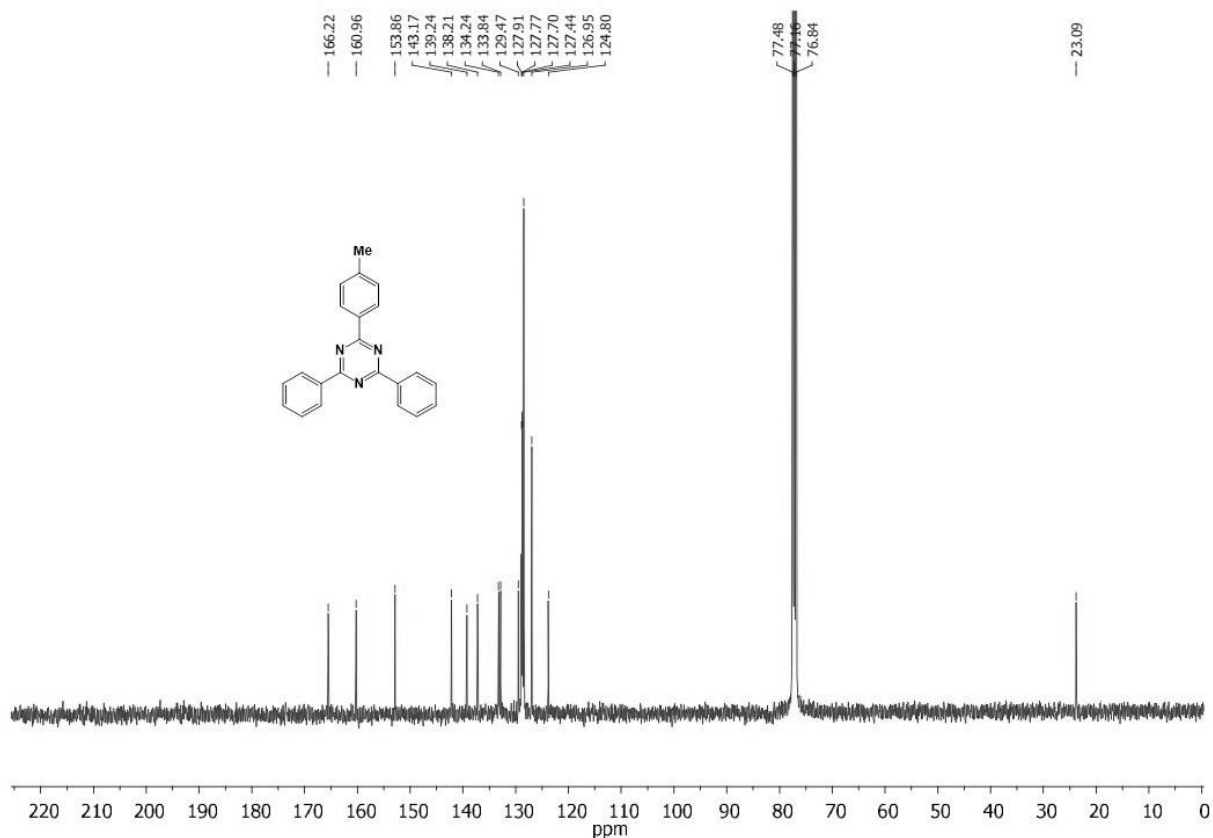

2,4-diphenyl-6-(p-tolyl)-1,3,5-triazine: <sup>1</sup>H NMR (400.1 MHz, CDCl<sub>3</sub>): δ = 8.09 (d, J = 7.4 Hz, 2H), 8.03 (d, J = 7.4 Hz, 2H), 7.63–7.53 (m, 4H), 7.51–7.43 (m, 5H), 7.41–7.40 (m, 2H), <sup>13</sup>C{<sup>1</sup>H} NMR (100.6 MHz, CDCl<sub>3</sub>): δ = 166.2, 161.0, 153.9, 143.2, 139.2, 138.2, 134.2, 133.8, 129.5, 127.9, 127.8, 127.7, 127.4, 127.4, 126.0, 124.8, 23.1.



## Supplementary Information

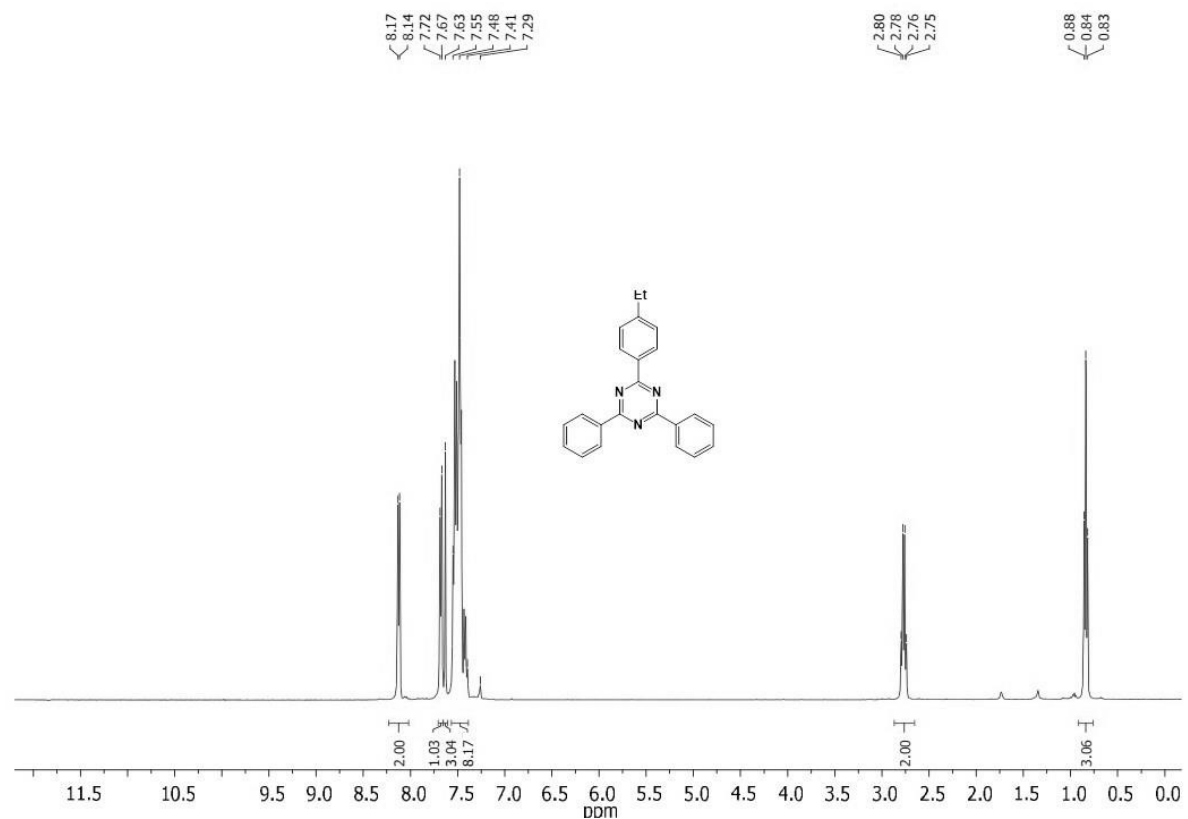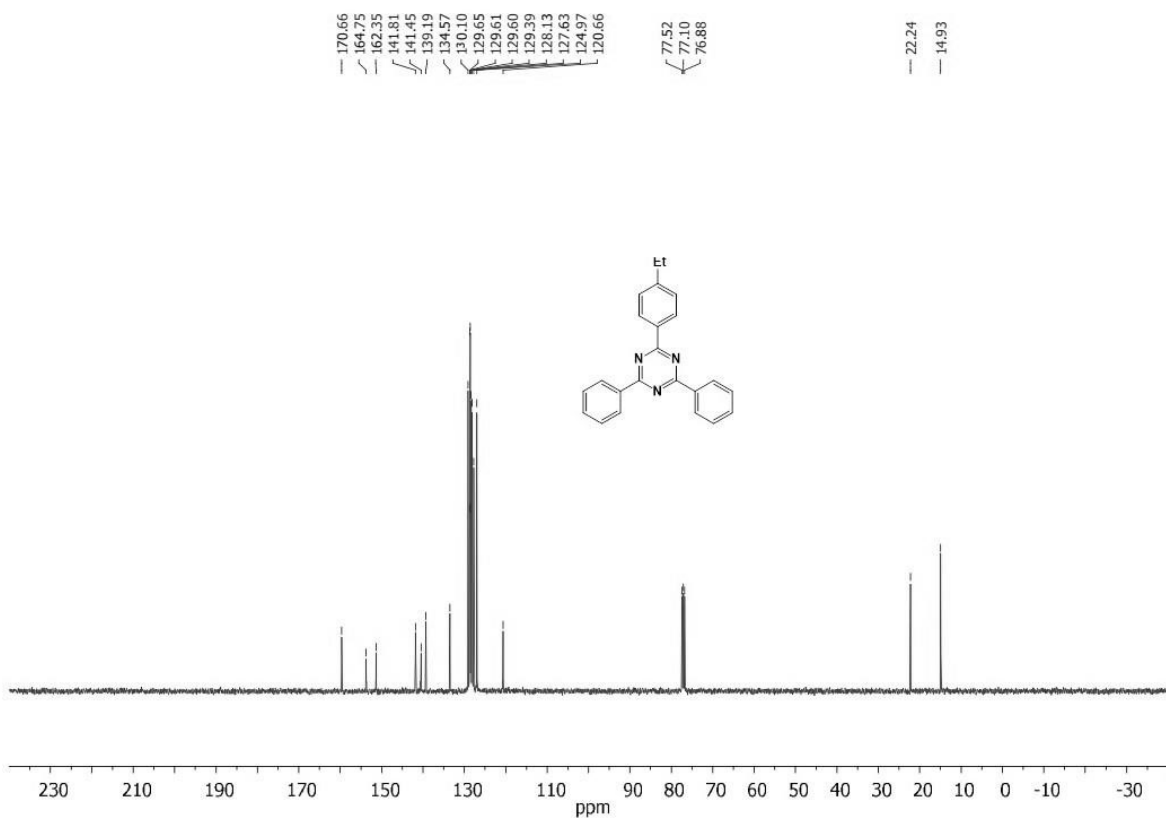

2-(4-ethylphenyl)-4,6-diphenyl-1,3,5-triazine:  $^1\text{H}$  NMR (400.1 MHz,  $\text{CDCl}_3$ ):  $\delta$  = 8.17 (d,  $J$  = 7.5 Hz, 2H), 7.72 (d,  $J$  = 7.5 Hz, 1H), 7.63 (m, 3H), 7.55–7.41 (m, 8H),  $^{13}\text{C}$  { $^1\text{H}$ } NMR (100.6 MHz,  $\text{CDCl}_3$ ):  $\delta$

## Supplementary Information

= 170.7, 164.8, 162.4, 141.8, 141.5, 139.3, 134.5, 130.1, 129.7, 129.6, 129.6, 129.6, 129.4, 128.1, 127.7, 124.0, 120.7, 22.4, 14.9.

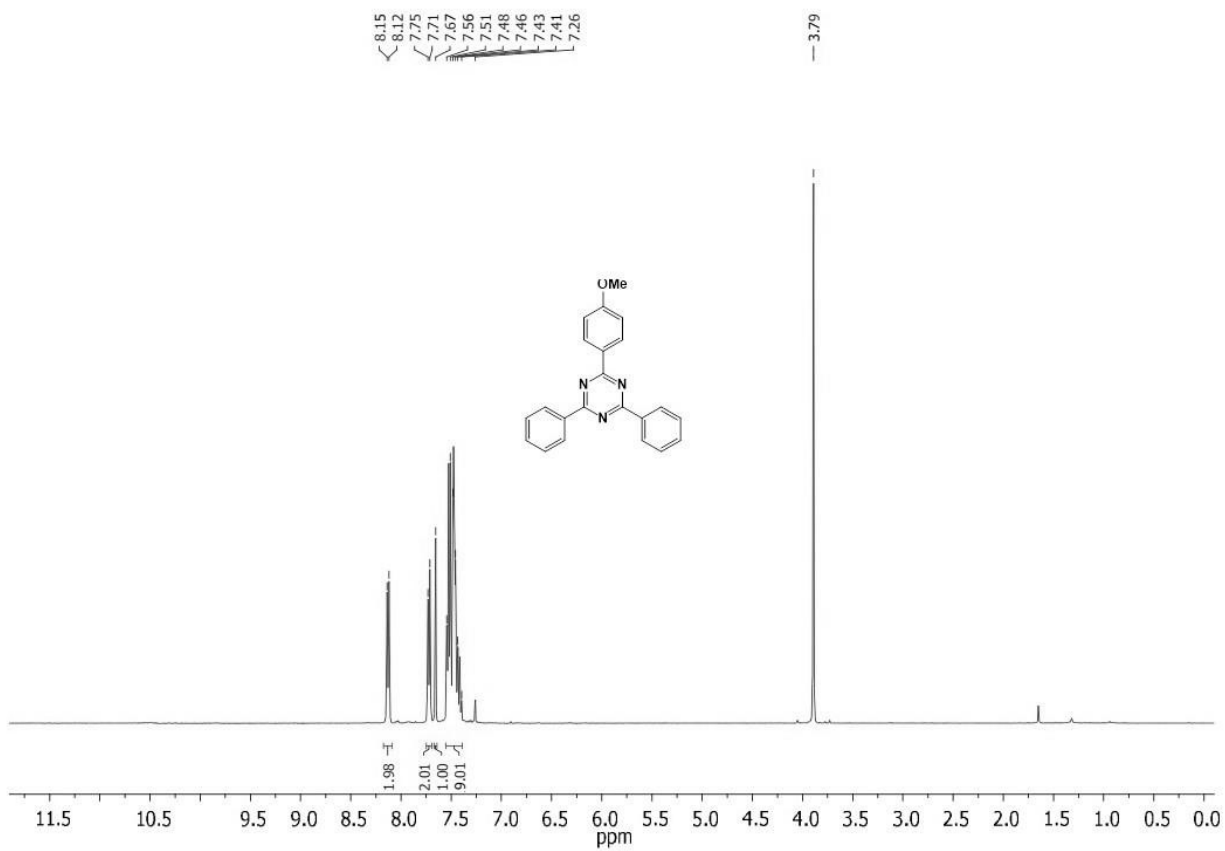

## Supplementary Information

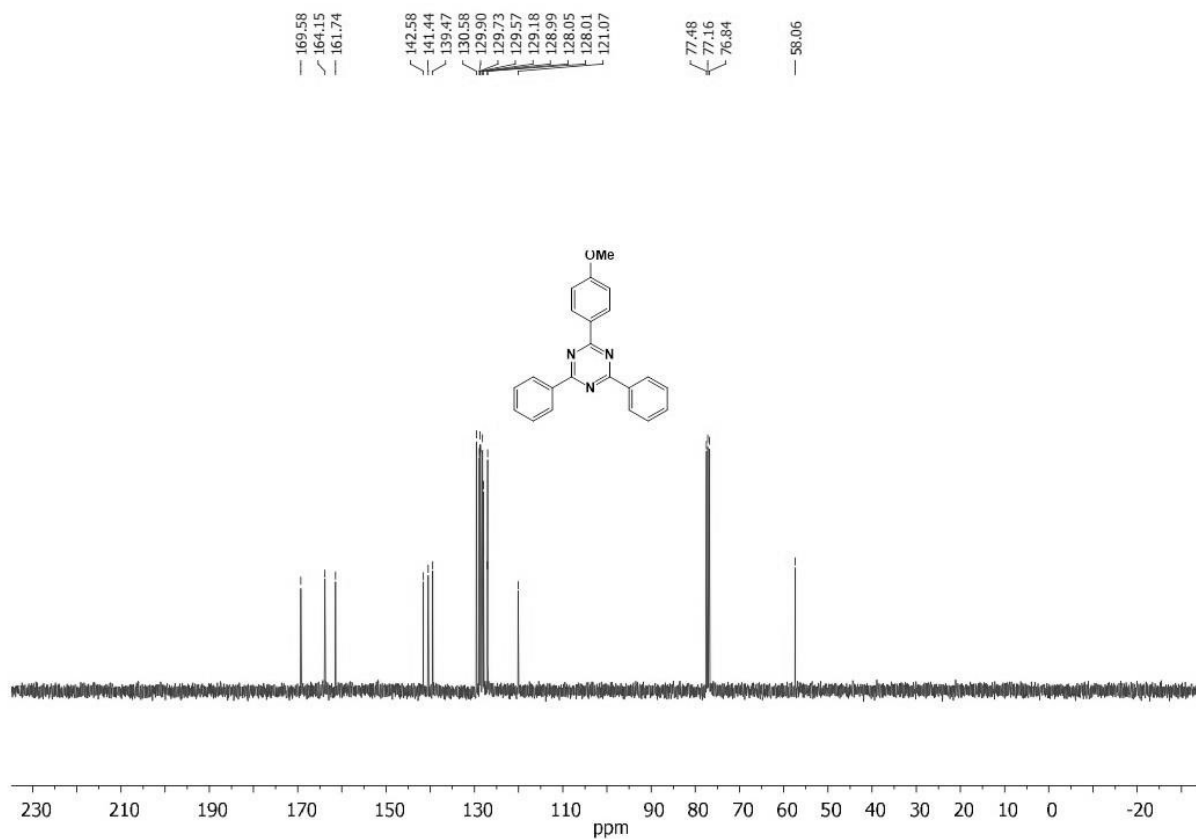

2-(4-methoxyphenyl)-4,6-diphenyl-1,3,5-triazine: <sup>1</sup>H NMR (400.1 MHz, CDCl<sub>3</sub>): δ = 8.15 (d, J = 7.6 Hz, 2H), 7.75–7.70 (m, 2H), 7.67 (s, 1H), 7.56–7.41 (m, 9H), <sup>13</sup>C {<sup>1</sup>H} NMR (100.6 MHz, CDCl<sub>3</sub>): δ = 169.6, 164.2, 161.7, 142.6, 141.4, 139.5, 130.6, 129.9, 129.7, 129.7, 129.6, 128.2, 128.0, 128.0, 128.1, 12.0, 121.1, 58.1.

# Supplementary Information

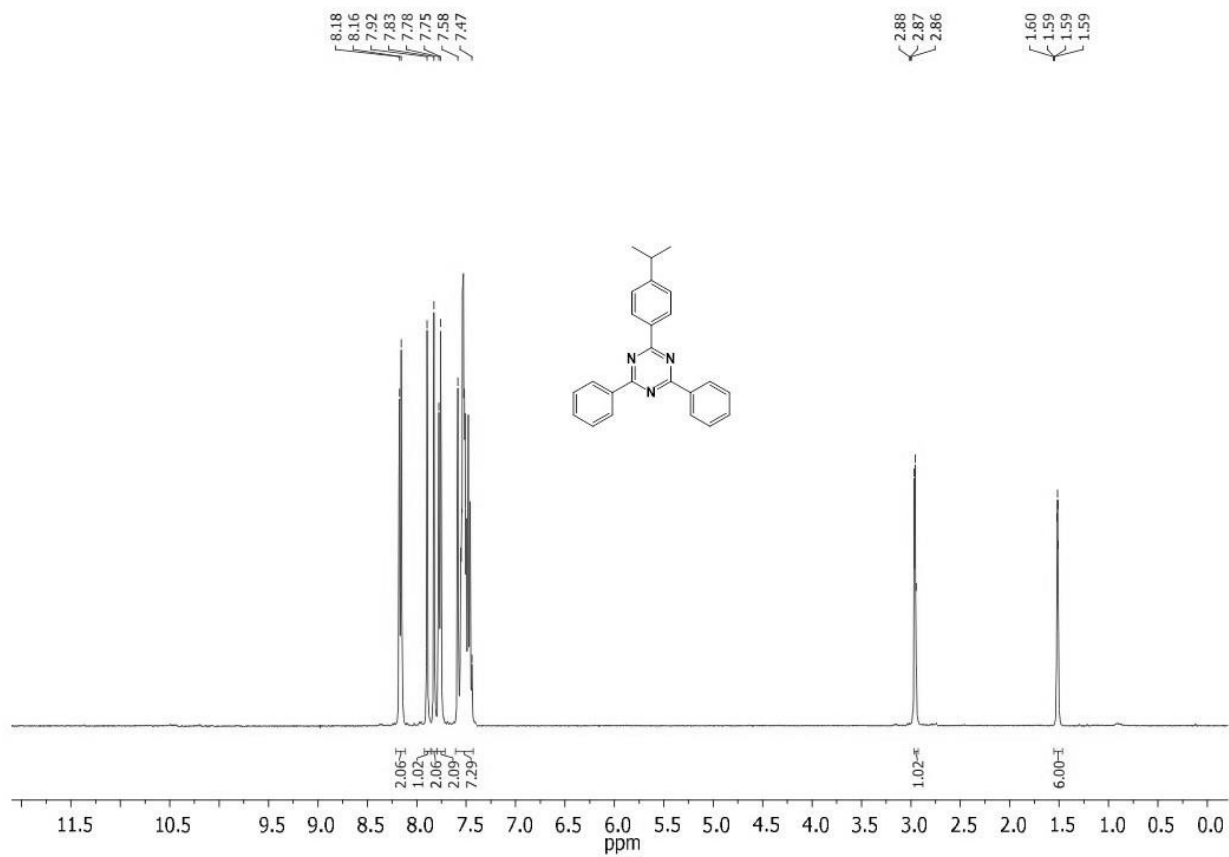

## Supplementary Information

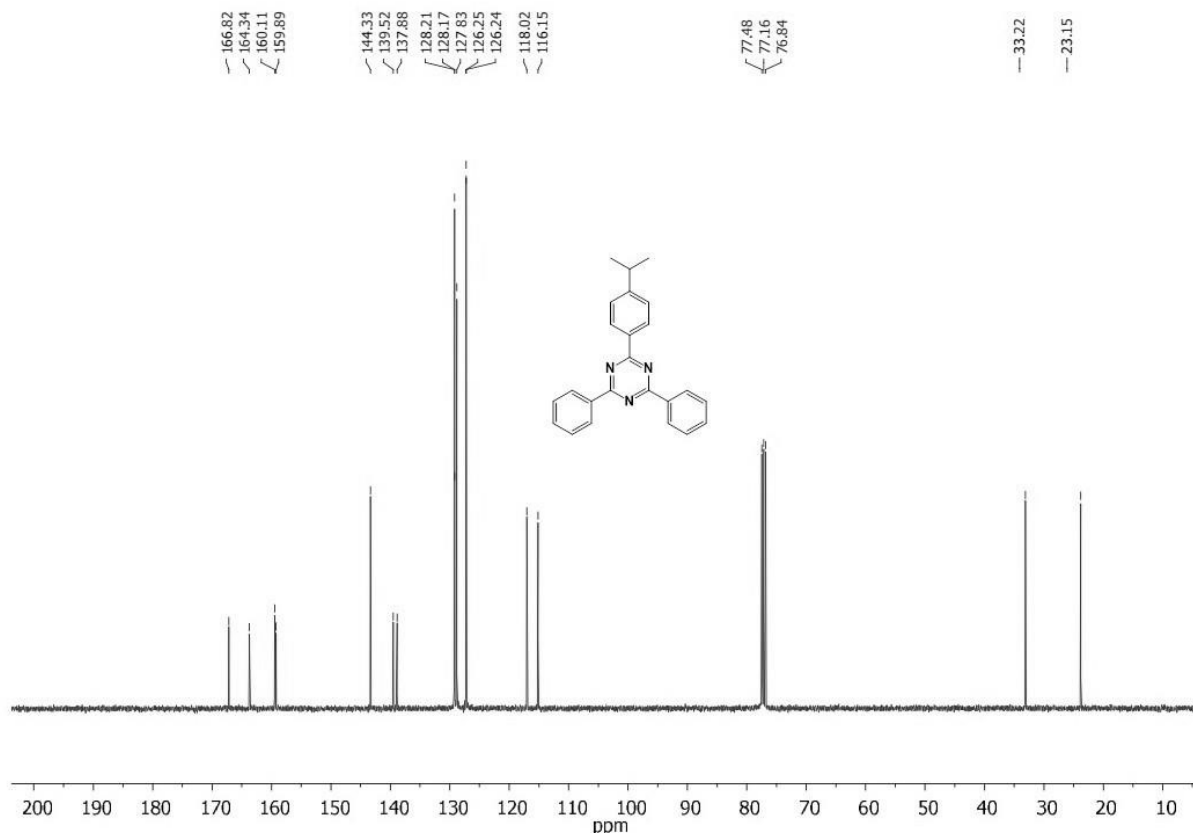

2-(4-isopropylphenyl)-4,6-diphenyl-1,3,5-triazine: <sup>1</sup>H NMR (400.1 MHz, CDCl<sub>3</sub>): δ = 8.16 (d, J = 7.2 Hz, 2H), 7.92 (s, 1H), 7.83 (s, 2H), 7.78 (d, J = 7.0 Hz, 2H), 7.58–7.47 (m, 7H), <sup>13</sup>C{<sup>1</sup>H} NMR (100.6 MHz, CDCl<sub>3</sub>): δ = 166.8, 164.3, 160.1, 159.9, 144.3, 139.5, 137.9, 128.2, 128.2, 127.8, 126.3, 126.2, 118.0, 116.2, 33.2, 23.1.

# Supplementary Information

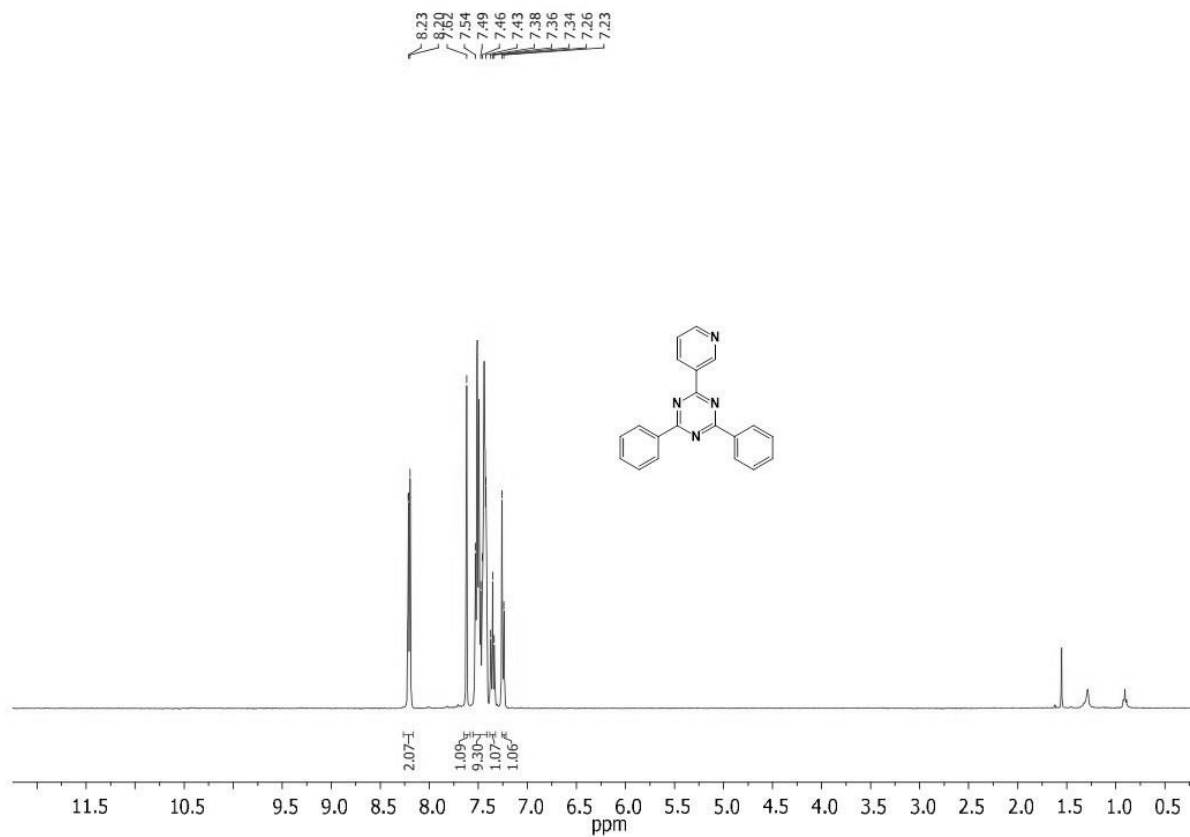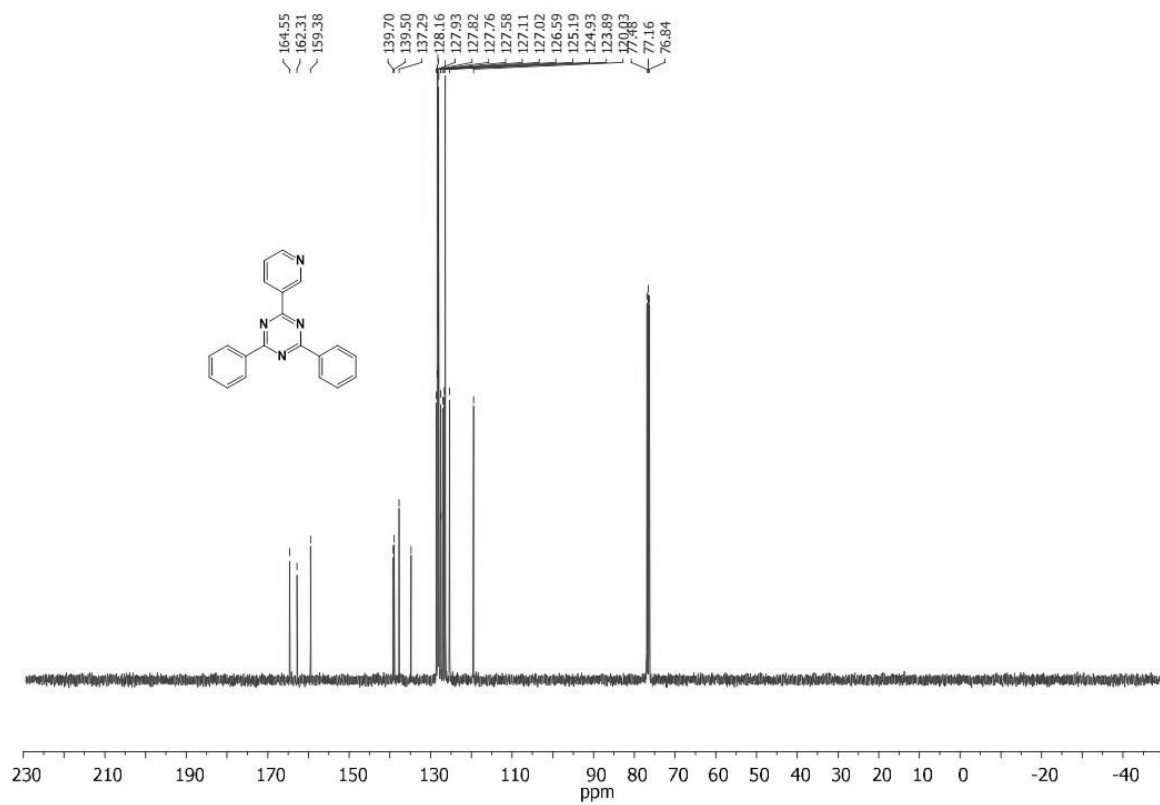

## Supplementary Information

2,4-diphenyl-6-(pyridin-3-yl)-1,3,5-triazine:  $^1\text{H}$  NMR (400.1 MHz,  $\text{CDCl}_3$ ):  $\delta$  = 8.23 (d,  $J$  = 8.3 Hz, 2H), 7.63 (s, 1H), 7.54–7.43 (m, 9H), 7.36 (t,  $J$  = 7.4 Hz, 1H), 7.23 (d,  $J$  = 8.5 Hz, 1H),  $^{13}\text{C}\{^1\text{H}\}$  NMR (100.6 MHz,  $\text{CDCl}_3$ ):  $\delta$  = 164.5, 162.3, 159.4, 139.7, 139.5, 137.3, 135.4, 128.2, 127.9, 127.8, 127.8, 127.6, 127.1, 127.0, 126.6, 125.2, 125.9, 123.9, 120.0.

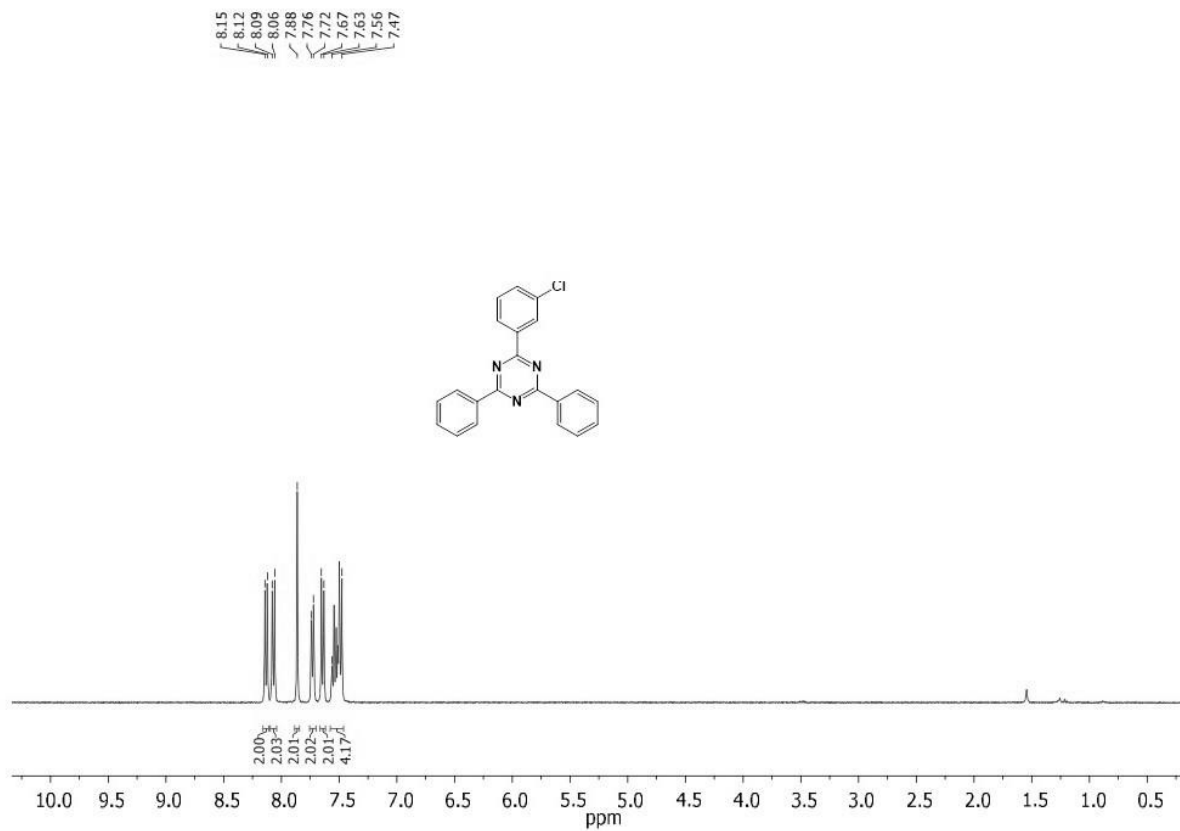

## Supplementary Information

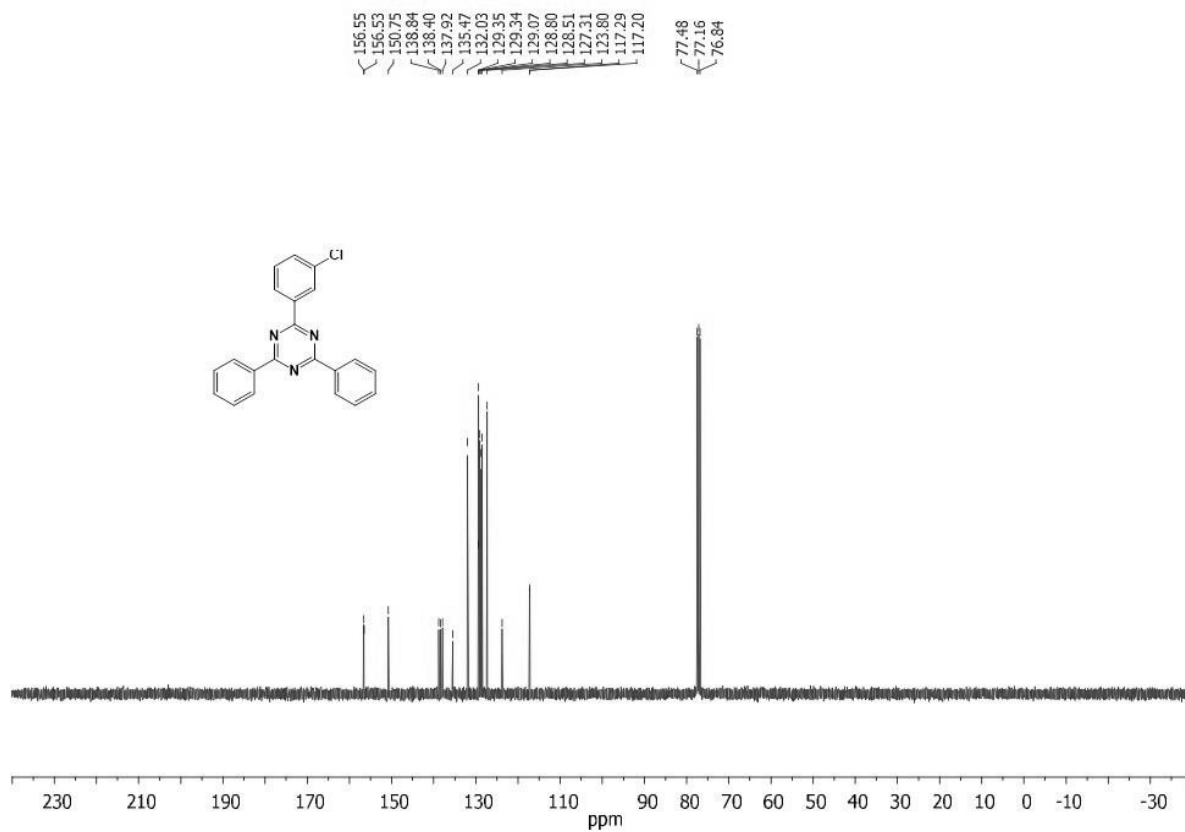

2-(3-chlorophenyl)-4,6-diphenyl-1,3,5-triazine: <sup>1</sup>H NMR (400.1 MHz, CDCl<sub>3</sub>): δ = 8.15 (d, J = 8.6 Hz, 2H), 8.09 (d, J = 8.6 Hz, 2H), 7.88 (s, 2H), 7.76 (d, J = 6.9 Hz, 2H), 7.67 (d, J = 8.6 Hz, 2H), 7.63–7.47 (m, 4H). <sup>13</sup>C{<sup>1</sup>H} NMR (100.6 MHz, CDCl<sub>3</sub>): δ = 156.6, 156.5, 150.8, 138.8, 138.4, 137.9, 135.5, 132.0, 129.4, 129.3, 129.1, 128.8, 128.5, 127.3, 123.8, 117.3, 117.2.



# Supplementary Information

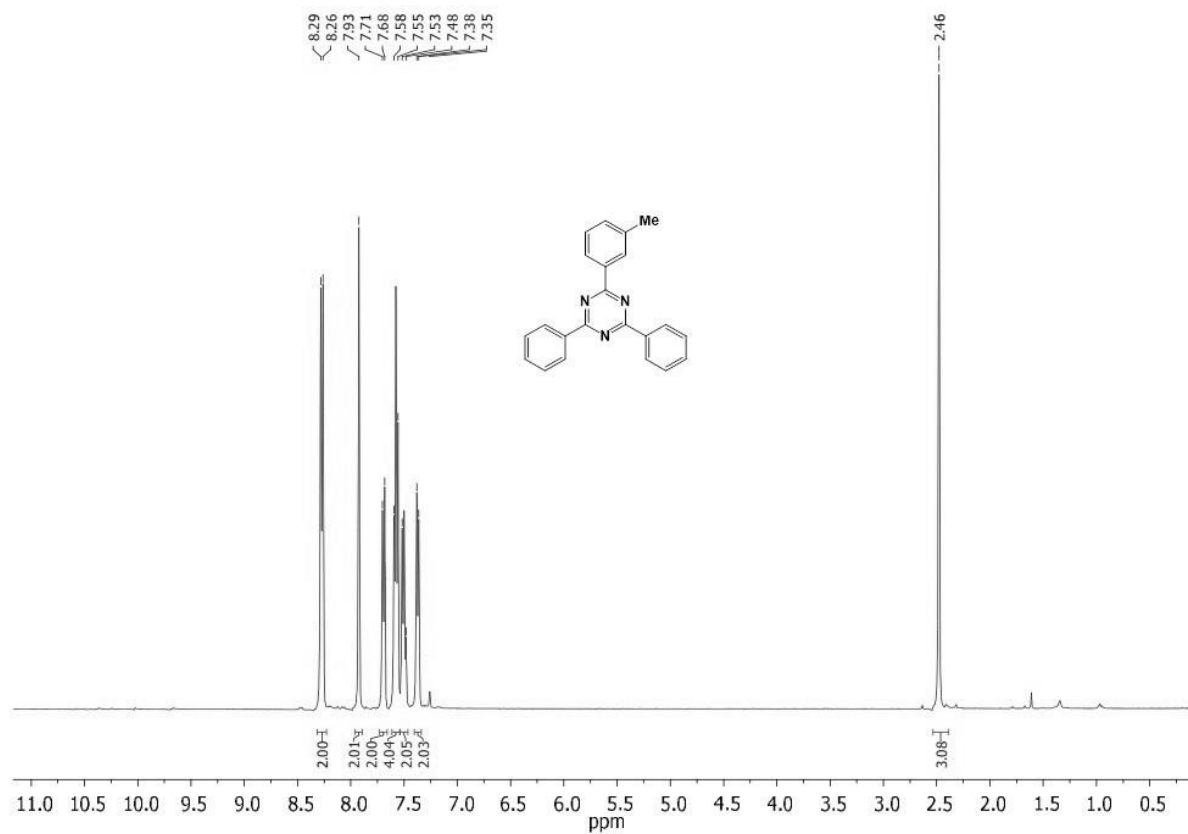

## Supplementary Information

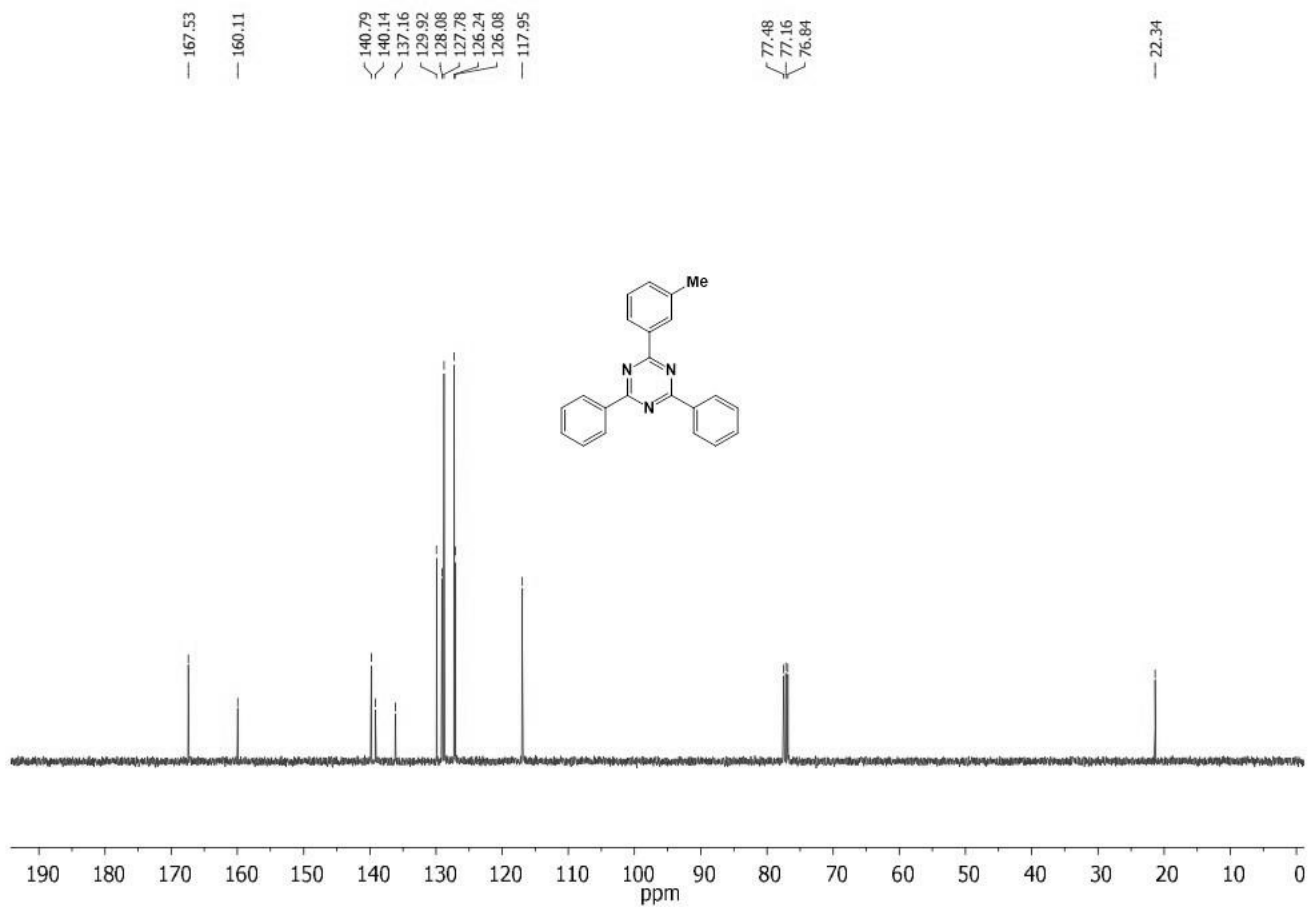

2-(3-methylphenyl)-4,6-diphenyl-1,3,5-triazine: <sup>1</sup>H NMR (400.1 MHz, CDCl<sub>3</sub>): δ = 8.29 (d, J = 7.5 Hz, 2H), 7.93 (s, 2H), 7.68 (d, J = 7.7 Hz, 2H), 7.58–7.53 (m, 4H), 7.48 (t, 2H), 7.38 (d, J = 7.7 Hz, 2H), <sup>13</sup>C{<sup>1</sup>H} NMR (100.6 MHz, CDCl<sub>3</sub>): δ = 167.5, 160.1, 140.8, 140.1, 137.2, 129.9, 128.1, 127.8, 126.2, 126.1, 118.0, 22.3.

# Supplementary Information

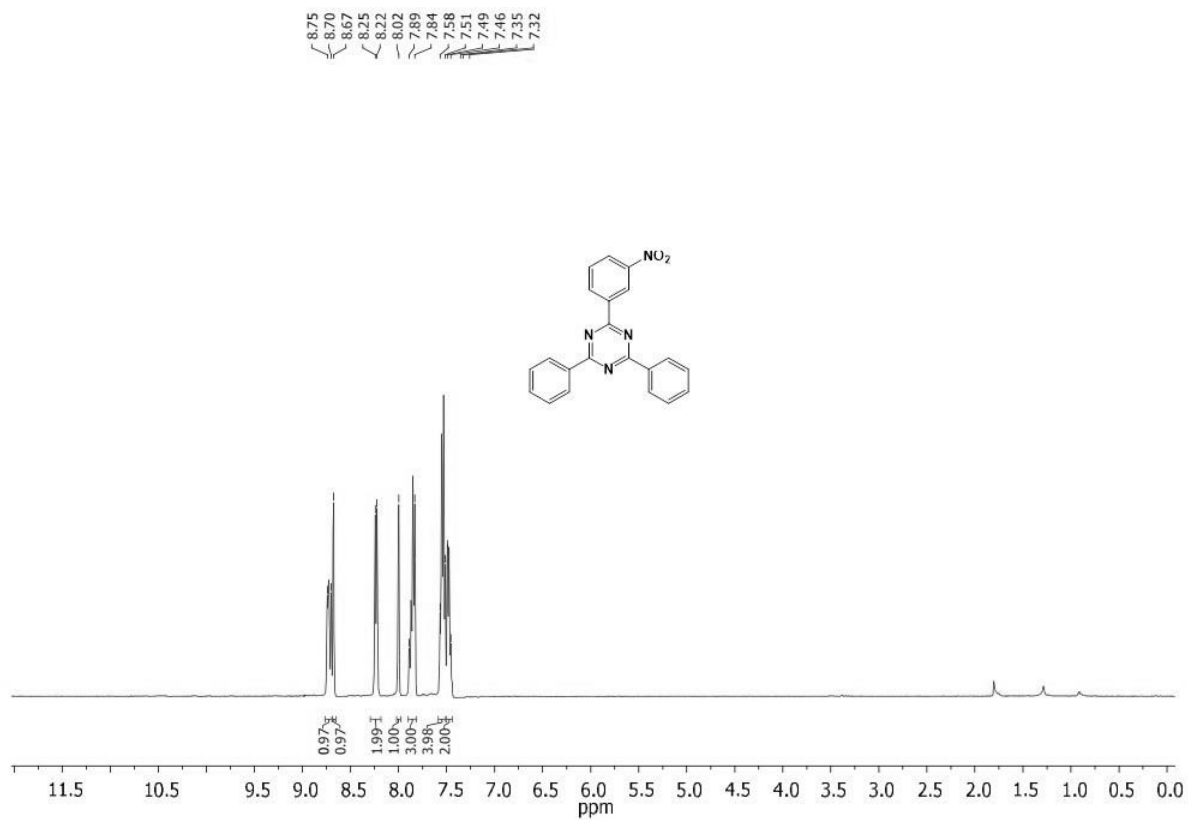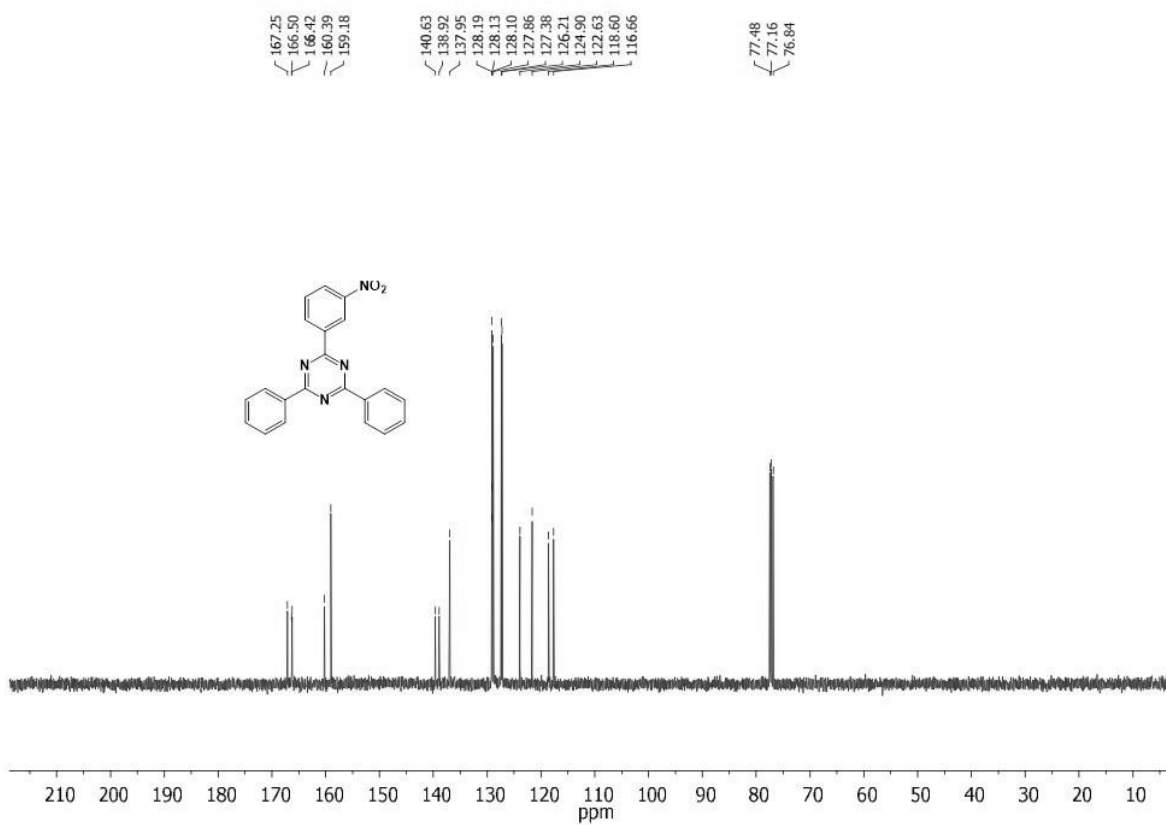

## Supplementary Information

2-(3-nitrophenyl)-4,6-diphenyl-1,3,5-triazine:  $^1\text{H}$  NMR (400.1 MHz,  $\text{CDCl}_3$ ):  $\delta$  = 8.75–8.70 (t, 1H), 8.68 (s, 1H), 8.25 (d,  $J$  = 7.3 Hz, 2H), 8.02 (s, 1H), 7.89–7.84 (m, 3H), 7.58–7.51 (m, 4H), 7.49–7.46 (m, 2H),  $^{13}\text{C}\{^1\text{H}\}$  NMR (100.6 MHz,  $\text{CDCl}_3$ ):  $\delta$  = 167.3, 166.5, 166.4, 160.4, 140.2, 140.0, 138.9, 137.0, 128.2, 128.1, 128, 127.9, 127.4, 126.2, 124.9, 122.6, 118.6, 116.7.

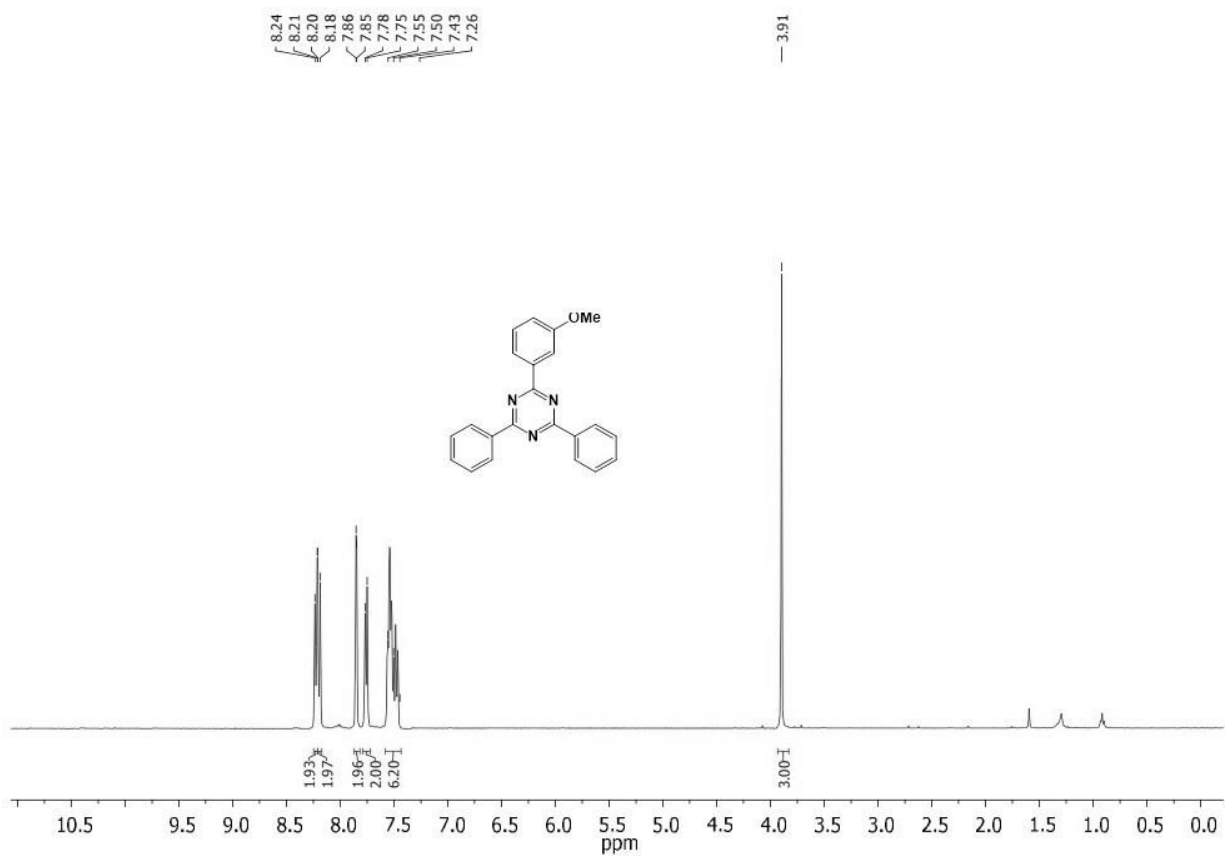

## Supplementary Information

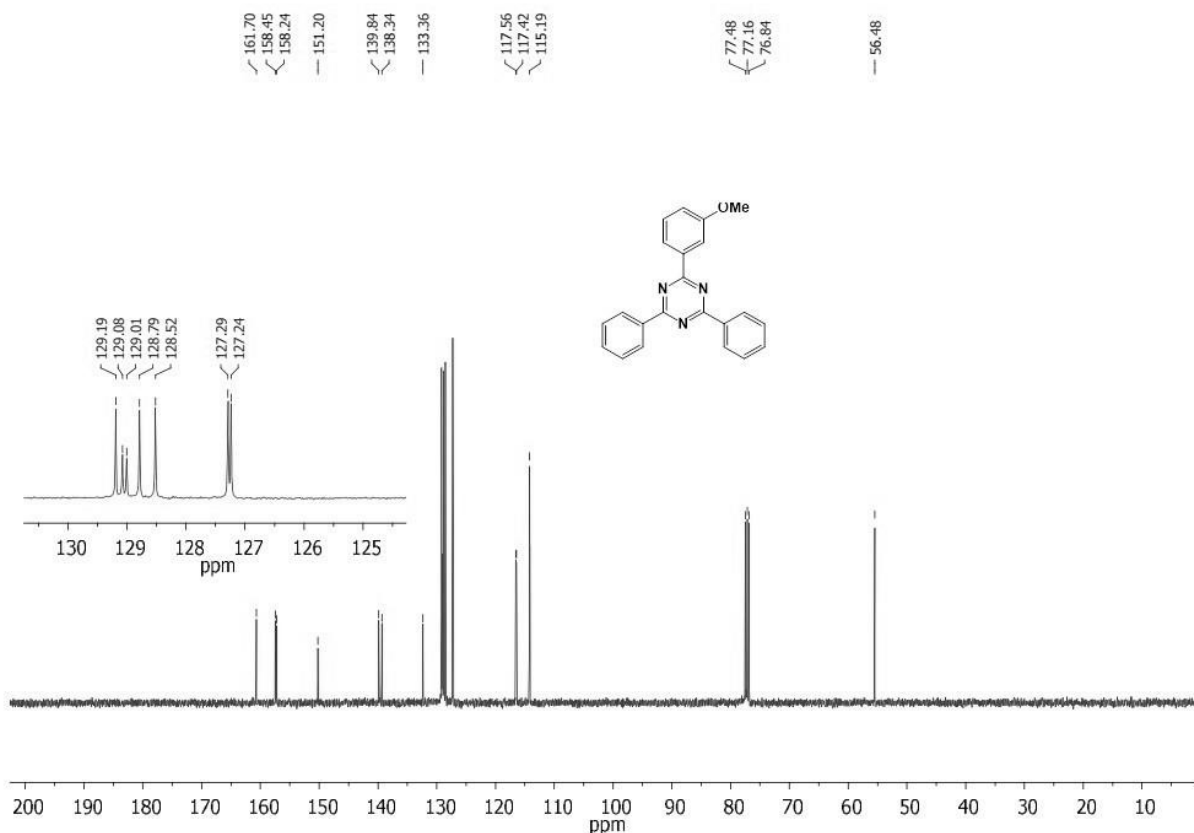

2-(3-methoxyphenyl)-4,6-diphenyl-1,3,5-triazine: <sup>1</sup>H NMR (400.1 MHz, CDCl<sub>3</sub>): δ = 8.24 (d, J = 7.8 Hz, 2H), 8.21 (d, J = 8.8 Hz, 2H), 7.86 (s, 1H), 7.85 (s, 1H), 7.78 (d, J = 7.2 Hz, 2H), 7.55–7.43 (m, 6H), <sup>13</sup>C{<sup>1</sup>H} NMR (100.6 MHz, CDCl<sub>3</sub>): δ = 161.7, 158.5, 158.2, 151.2, 139.8, 138.3, 133.4, 129.2, 129.1, 129.0, 128.8, 128.5, 127.3, 127.2, 117.6, 117.4, 115.2, 56.5.

# Supplementary Information

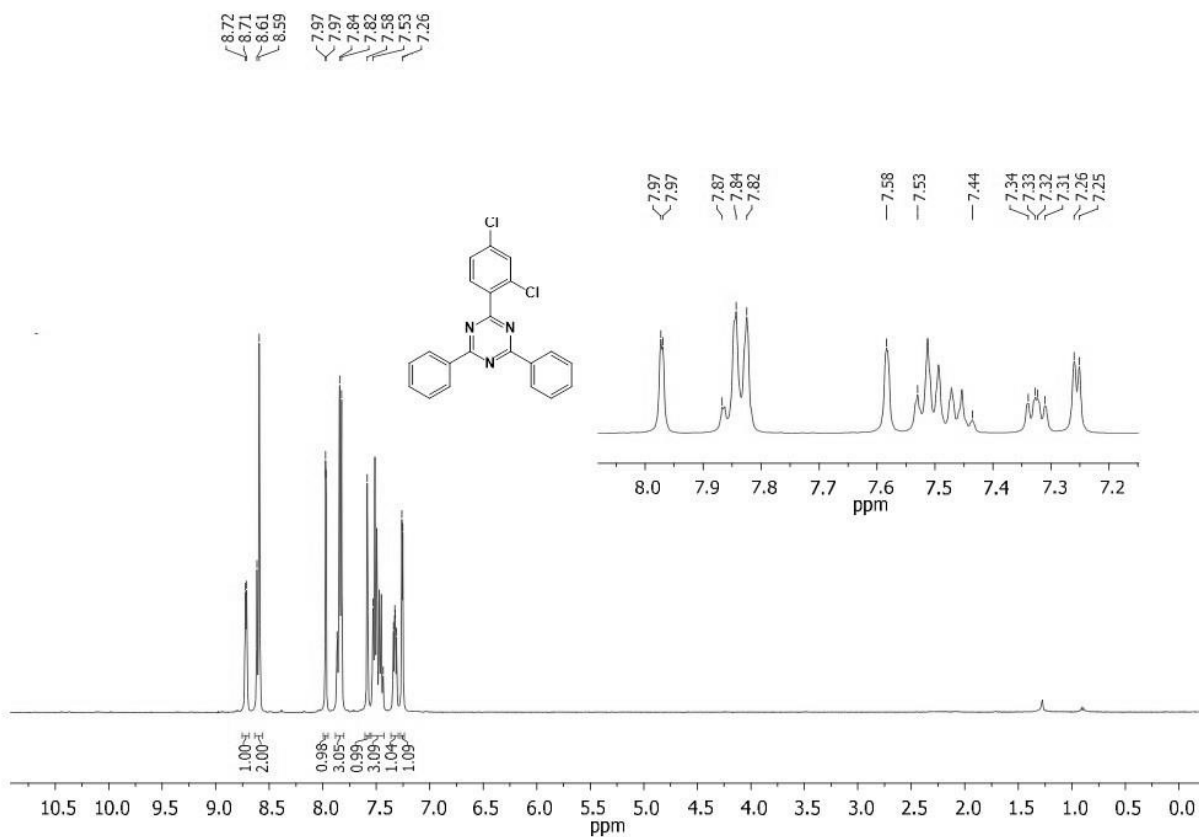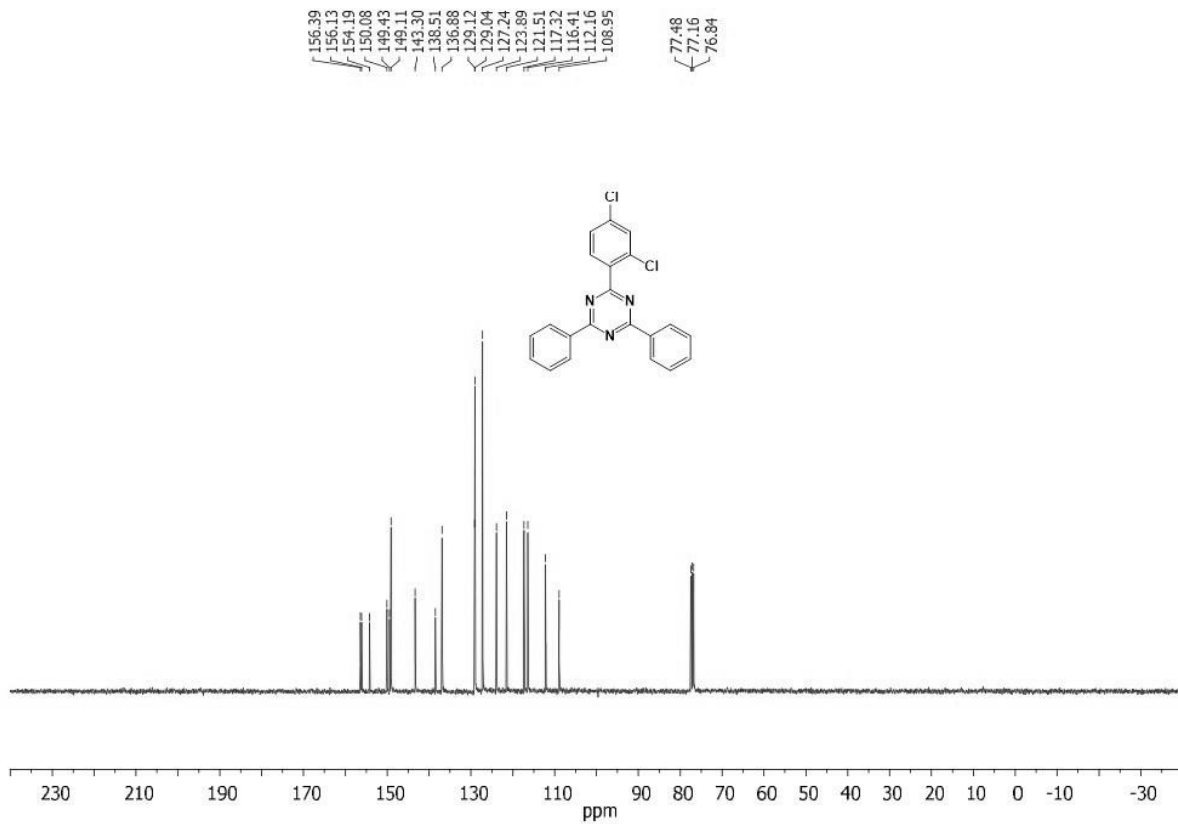

## Supplementary Information

2-(2,4-dichlorophenyl)-4,6-diphenyl-1,3,5-triazine: <sup>1</sup>H NMR (400.1 MHz, CDCl<sub>3</sub>): δ = 8.71 (d, J = 4.0 Hz, 1H), 8.61–8.58 (m, 2H), 7.97 (t, 1H), 7.87–7.82 (m, 3H), 7.58 (s, 1H), 7.53–7.43 (m, 3H), 7.32 (dd, J = 5.0 Hz, J = 6.5 Hz, 1H), 7.26 (d, J = 3.3 Hz, 1H), <sup>13</sup>C{<sup>1</sup>H} NMR (100.6 MHz, CDCl<sub>3</sub>): δ = 156.4, 156.1, 154.3, 150.1, 149.4, 149.2, 143.3, 138.5, 136.8, 129.1, 129.0, 127.1, 123.9, 121.5, 117.3, 116.4, 112.2, 108.9.

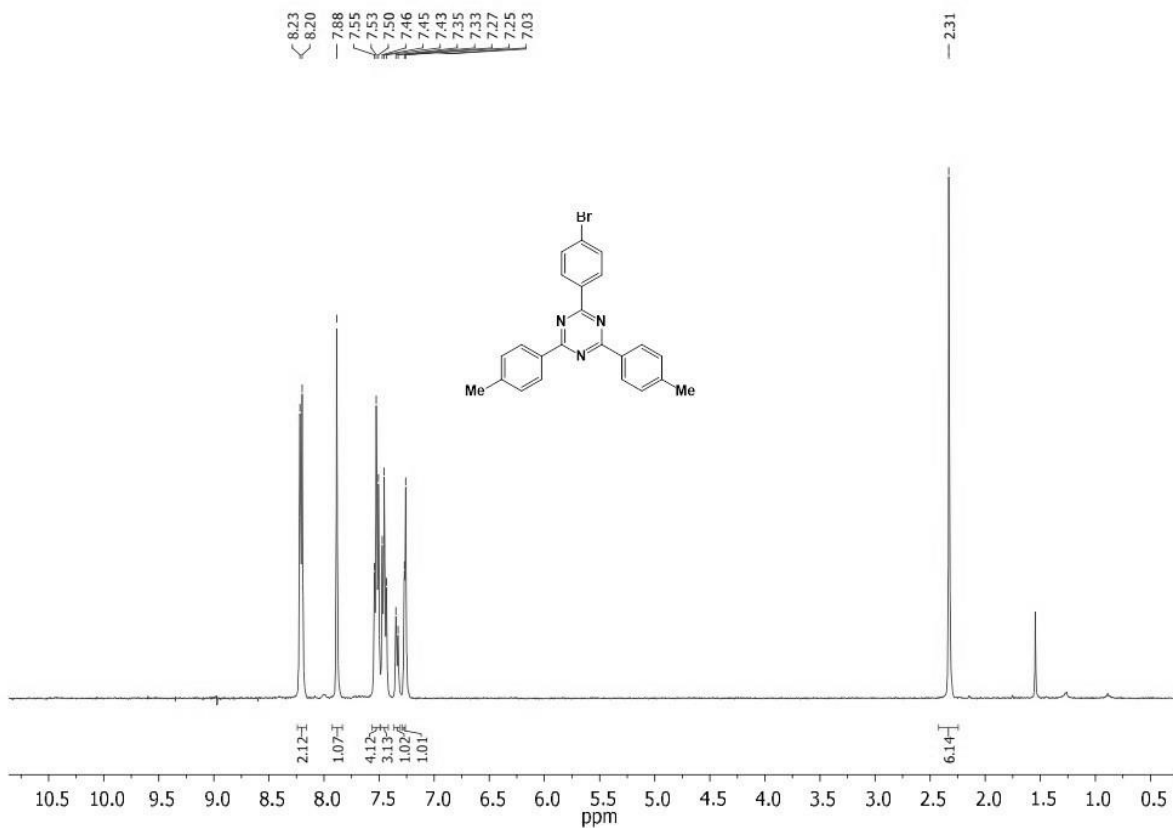

## Supplementary Information

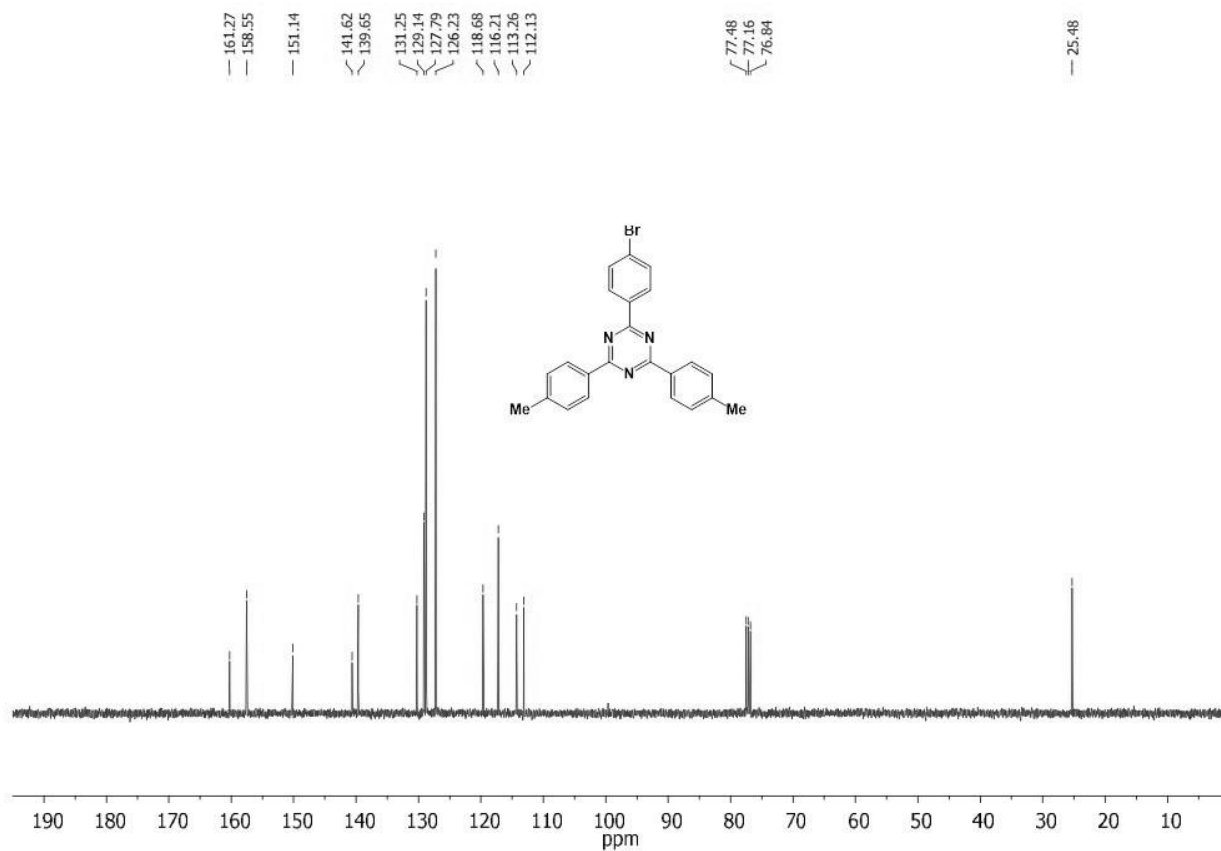

2-(4-bromophenyl)-4,6-di-p-tolyl-1,3,5-triazine: <sup>1</sup>H NMR (400.1 MHz, CDCl<sub>3</sub>): δ = 8.22 (d, J = 7.4 Hz, 2H), 7.88 (s, 1H), 7.55–7.50 (m, 4H), 7.46–7.43 (m, 3H), 7.33 (d, J = 7.6 Hz, 1H), 7.27–7.25 (m, 1H), <sup>13</sup>C{<sup>1</sup>H} NMR (100.6 MHz, CDCl<sub>3</sub>): δ = 161.3, 158.6, 151.1, 141.6, 139.7, 131.3, 129.1, 127.8, 126.2, 118.7, 116.2, 113.3, 112.1, 25.5.



# Supplementary Information

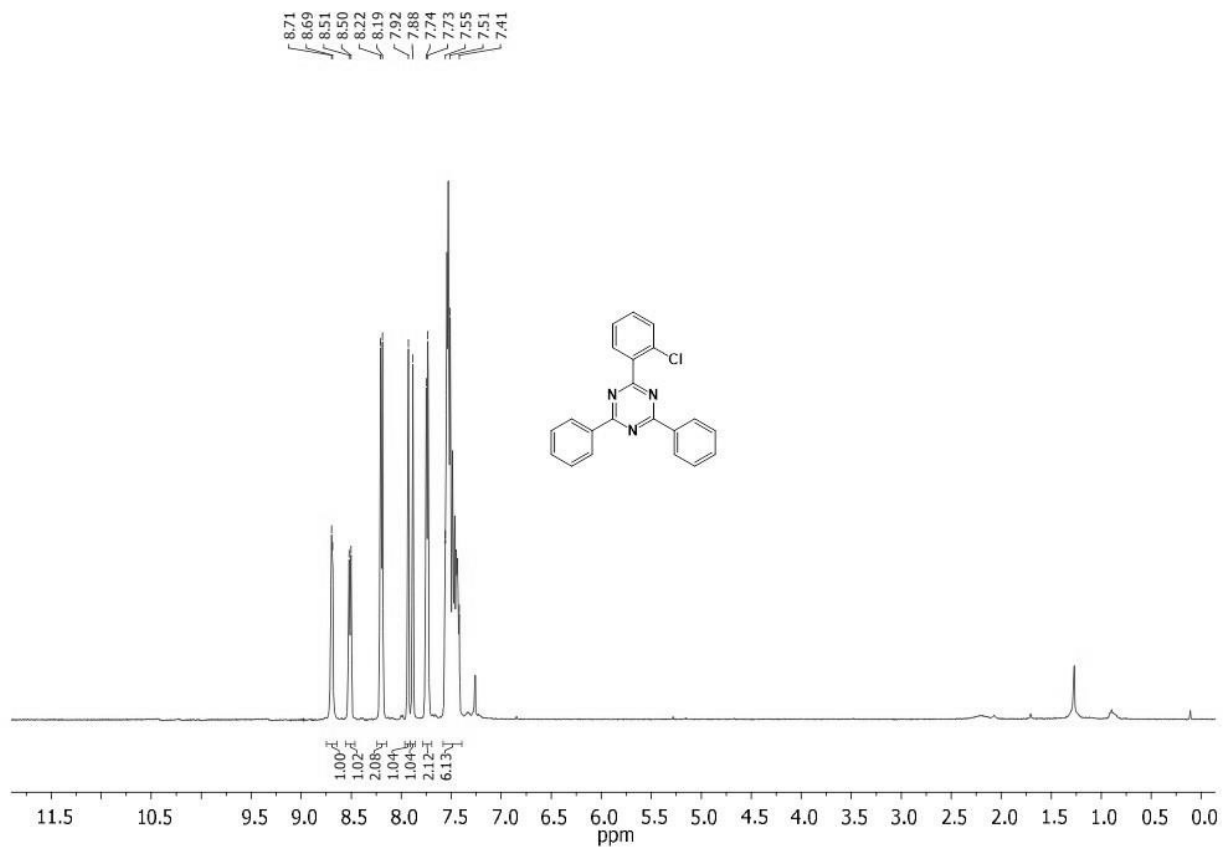

## Supplementary Information

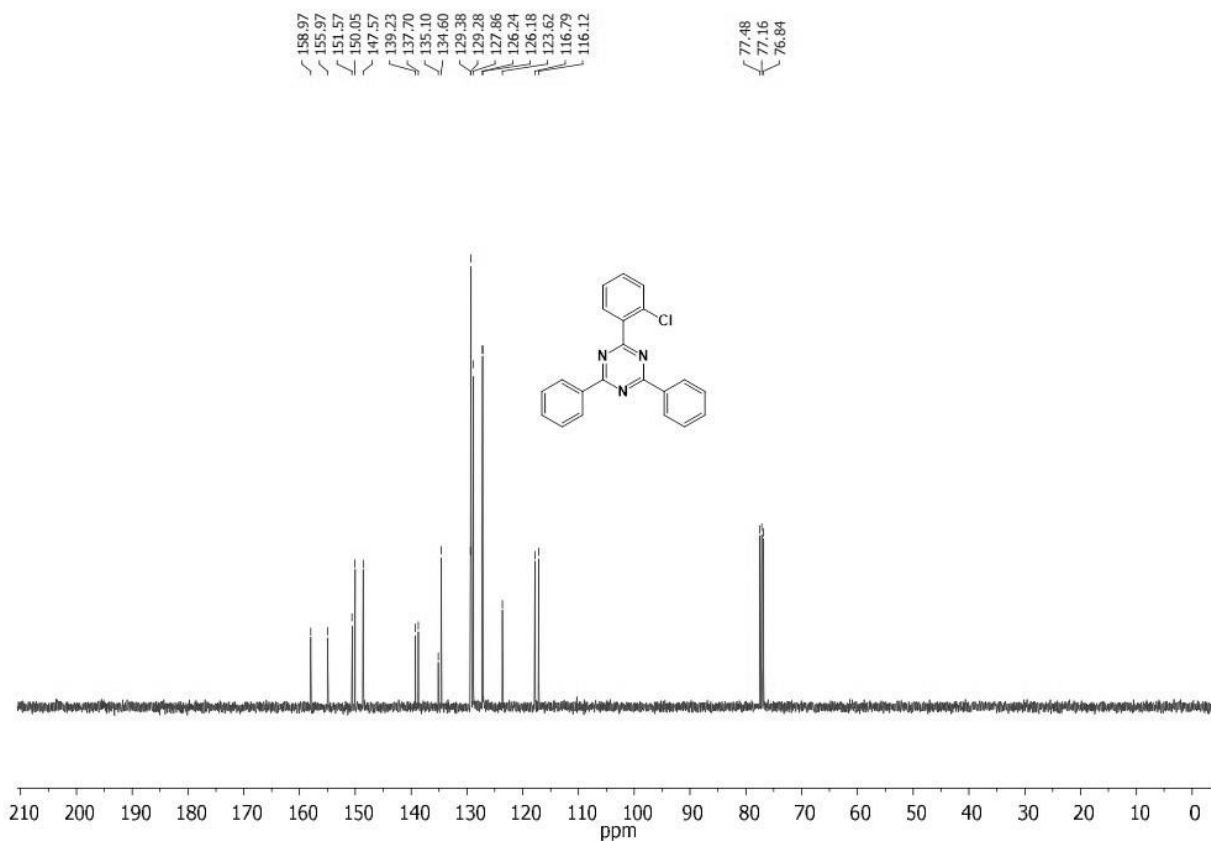

2-(2-chlorophenyl)-4,6-diphenyl-1,3,5-triazine: <sup>1</sup>H NMR (400.1 MHz, CDCl<sub>3</sub>): δ = 8.71 (d, J = 3.7 Hz, 1H), 8.51 (d, J = 7.9 Hz, 1H), 8.22 (d, J = 7.2 Hz, 2H), 7.92 (s, 1H), 7.88 (s, 1H), 7.73 (d, J = 6.9 Hz, 2H), 7.55–7.41 (m, 6H). <sup>13</sup>C {<sup>1</sup>H} NMR (100.6 MHz, CDCl<sub>3</sub>): δ = 159.0, 156.0, 151.6, 150.1, 147.6, 139.2, 137.7, 135.1, 134.6, 129.4, 129.3, 127.9, 126.2, 126.2, 123.6, 116.8, 116.1.
